1 Protection from viral rebound after therapeutic vaccination with an adjuvanted DNA vaccine is  
2 associated with SIV-specific polyfunctional CD8 T cells in the blood and mesenteric lymph nodes

3

4 Protection from SIV viral rebound and polyfunctional CD8 T cells

5

6

7 Hillary C. Tunggal<sup>1,2</sup>, Paul V. Munson<sup>1,2</sup>, Megan A. O'Connor<sup>1,2</sup>, Nika Hajari<sup>2</sup>, Sandra E. Dross<sup>1,2</sup>,  
8 Debra Bratt<sup>2</sup>, James T. Fuller<sup>1</sup>, Kenneth Bagley<sup>3</sup>, Deborah Heydenburg Fuller<sup>1,2\*</sup>

9 1. Department of Microbiology, University of Washington, Seattle, WA, USA

10 2. Washington National Primate Research Center, Seattle, WA, USA

11 3. Profectus Biosciences, Baltimore, MD, USA

12

13 \*Corresponding Author:

14 Deborah Heydenburg Fuller

15 Professor, Department of Microbiology

16 University of Washington

17 Seattle, WA 98195

18 [fullerdh@uw.edu](mailto:fullerdh@uw.edu)

19 **Abstract:**

20 A therapeutic vaccine that induces lasting control of HIV infection has the potential to  
21 eliminate the need for lifelong adherence to antiretroviral therapy (ART). This study investigated  
22 the efficacy of a therapeutic DNA vaccine delivered with a novel combination of adjuvants and  
23 immunomodulators to augment T cell immunity in the blood and gut-associated lymphoid tissue.  
24 In SIV-infected rhesus macaques, a DNA vaccine delivered by intradermal electroporation and  
25 expressing SIV Env, Gag, and Pol, and a combination of adjuvant plasmids expressing the catalytic  
26 A1 subunit of *E. coli* heat labile enterotoxin (LTA1), IL-12, IL-33, retinaldehyde dehydrogenase  
27 2 and the immunomodulators soluble PD-1 and soluble CD80, significantly enhanced the breadth  
28 and magnitude of Gag-specific IFN- $\gamma$  T cell responses when compared to controls that were mock  
29 vaccinated or received the same DNA vaccine delivered by Gene Gun with a single adjuvant, the  
30 *E. coli* heat labile enterotoxin, LT. Notably, the DNA vaccine and adjuvant combination protected  
31 3/5 animals from viral rebound, compared to only 1/4 mock vaccinated animals and 1/5 animals  
32 that received the DNA vaccine and LT. The lower viral burden among controllers during analytical  
33 treatment interruption significantly correlated with higher polyfunctional CD8<sup>+</sup> T-cells (CD8<sup>+</sup> T  
34 cells expressing 3 or more effector functions) in both mesenteric lymph nodes and blood measured  
35 during ART and analytical treatment interruption. Interestingly, controllers also had lower viral  
36 loads during acute infection and ART suggesting that inherent host-viral interactions induced prior  
37 to ART initiation likely influenced the response to therapeutic vaccination. These data indicate  
38 that gut mucosal immune responses combined with effective ART may play a key role in  
39 containing residual virus post-ART and highlight the need for therapeutic vaccines and adjuvants  
40 that can restore functional quality of peripheral and mucosal T cell responses before and during  
41 ART.

42 **Author Summary:**

43           HIV has caused significant human disease and mortality since its emergence in the 1980s.  
44   Furthermore, although antiretroviral therapy (ART) effectively reduces viral replication, stopping  
45   ART leads to increased viral loads and disease progression in most HIV-infected people. A  
46   therapeutic vaccine could enable HIV-infected people to control their infection without ART, but  
47   none of the vaccines that were tested in clinical trials so far have induced long-lasting control of  
48   virus replication. Here, we used the SIV rhesus macaque model to test a therapeutic vaccine  
49   consisting of DNA expressing SIV proteins and a novel combination of adjuvants to boost virus-  
50   specific immune responses. We found that our vaccine strategy significantly enhanced SIV-  
51   specific T cell responses when compared to controls and protected 3/5 animals from viral rebound.  
52   We determined that lower levels of virus replication post-ART were associated with enhanced T  
53   cell immunity in the gut-draining lymph nodes and blood. Our study highlights the critical role of  
54   T cell immunity for control of SIV and HIV replication and demonstrates that a successful  
55   therapeutic vaccine for HIV will need to elicit potent T cell responses in both the blood and gut-  
56   associated tissues.

57

58 **Introduction:**

59 ART greatly reduces HIV replication and restores CD4<sup>+</sup> T cell counts, thus preventing  
60 progression to AIDS and prolonging the lifespan of HIV-infected people [1]. However, ART alone  
61 is unable to eliminate the latent viral reservoir, which necessitates strict lifelong adherence to a  
62 daily ART regimen [2]. For most individuals, ART interruption will lead to a resurgence in viral  
63 replication within weeks [3]. However, continuous usage of ART can be prohibitively expensive  
64 and may result in side effects that discourage compliance [4, 5]. Furthermore, ART cannot fully  
65 reverse the immune dysfunction induced by HIV, particularly in the gut mucosa, that drives  
66 chronic immune activation and disease pathogenesis [6, 7]. These drawbacks are why a vaccine or  
67 cure are still urgently needed to bring an end to the HIV pandemic.

68 To this end, many different cure strategies are in development, including therapeutic HIV  
69 vaccines designed to enhance virus-specific T cellular and humoral immune responses to achieve  
70 control of virus replication without ART. Numerous therapeutic HIV vaccines have been tested,  
71 both in the SIV/SHIV nonhuman primate (NHP) model and in human clinical trials, including  
72 protein subunit [8, 9], live-attenuated [10], dendritic cell [11], viral vectored [12, 13], and DNA  
73 vaccines [14-16]. Unfortunately, none of these approaches have resulted in durable control of  
74 viremia in human clinical trials [17].

75 While there are many barriers to an effective HIV therapeutic vaccine, we contend that the  
76 lack of success thus far may be partially attributed to insufficient vaccine immunogenicity in the  
77 gut and gut-associated lymphoid tissues (GALT). The gut is a major site of HIV and SIV  
78 replication [18-20], resulting in depletion and functional alteration of gut mucosal CD4<sup>+</sup> T cells,  
79 and loss of antigen-presenting cells and innate lymphocytes [21]. These events contribute to  
80 structural damage of the gastrointestinal (GI) tract and systemic translocation of GI microbial

81 products that drive chronic immune activation and disease pathogenesis [22, 23]. Here, we  
82 investigated a strategy to enhance mucosal-associated immunity by incorporating adjuvants and  
83 immunomodulators specifically designed to potently boost HIV-specific immunity in both the  
84 periphery and the gut mucosa, with the goal of eliciting robust control of viremia following ART  
85 cessation.

86 We previously showed in the SIV rhesus macaque model that epidermal co-delivery of  
87 plasmids encoding an SIV whole antigen DNA vaccine and the mucosal adjuvant, heat-labile *E.*  
88 *coli* enterotoxin (LT), induced durable protection from viral rebound and disease progression for  
89 10 months after ART withdrawal in 5/7 animals, in comparison to 1/7 animals in the mock  
90 vaccinated control group [15]. This outcome was associated with significant increases in SIV-  
91 specific CD8<sup>+</sup> T cells expressing dual effector functions in the blood, and IFN- $\gamma$  T cell responses  
92 in both the blood and gut [15]. Notably, mucosal T cell responses in vaccinated animals  
93 significantly correlated with reduced virus production in both mucosal tissues and in plasma [15],  
94 indicating that SIV-specific responses in the gut may be important for controlling viral rebound.  
95 These results demonstrate that inducing vigorous immune responses in the mucosa may be critical  
96 for control of viremia and the importance of using potent adjuvants to maximize vaccine efficacy.

97 These findings prompted us to explore methods to further enhance the breadth, function  
98 and magnitude of mucosal T cell responses. Using the SIV rhesus macaque model, we tested the  
99 therapeutic efficacy of a novel combination of adjuvants and a multiantigen SIV DNA vaccine  
100 (MAG) delivered by intradermal electroporation. Our adjuvant combination (AC) consisted of co-  
101 delivered plasmids encoding the catalytic subunit of LT (LTA1), the cytokines IL-12 and IL-33,  
102 the enzyme retinaldehyde dehydrogenase 2 (RALDH2), soluble PD-1 (sPD-1), and soluble CD80  
103 (sCD80). LTA1 is a potent adjuvant that performs similarly to LT, through the recruitment and

104 activation of dendritic cells [24, 25]. The IL-12 adjuvant has been widely used in both NHP and  
105 human clinical trials [26, 27] and promotes differentiation of naïve CD4<sup>+</sup> and CD8<sup>+</sup> T cells to Th1  
106 and cytotoxic T lymphocytes (CTLs), respectively. IL-33 has also been shown to augment  
107 vaccine-induced immunity in mice [28, 29], and works by directly promoting the activity of Th1  
108 cells and CTLs [30, 31]. RALDH2 was included to enhance vaccine immunogenicity in the  
109 mucosa through the conversion of retinaldehyde to retinoic acid, the molecule responsible for  
110 inducing the expression of the mucosal homing factors CCR9 and  $\alpha4\beta7$  on activated lymphocytes  
111 [32, 33]. Finally, since previous studies showed that blocking the PD-1 and CTLA-4 pathways  
112 can enhance antigen-specific immunity, reduce immune activation, and restore immune exhaustion  
113 [34, 35], we co-delivered plasmids expressing rhesus-specific sPD-1 and sCD80 to block the  
114 interaction of CD8<sup>+</sup> T cells expressing PD-1 and CTLA-4 with antigen presenting cells (APCs)  
115 expressing PDL-1 and CD80.

116         The results shown here demonstrate that vaccination of SIV-infected, ART-treated rhesus  
117 macaques with the MAG DNA vaccine and the adjuvant combination (MAG + AC) increased the  
118 magnitude, breadth, and durability of IFN- $\gamma$  T cell responses when compared to the mock  
119 vaccinated controls or animals vaccinated with the MAG DNA adjuvanted with only LT (MAG +  
120 LT), with the majority of the response targeting Gag sequences. Following analytic treatment  
121 interruption (ATI, discontinuation of ART), three out of five animals (60%) in the MAG + AC  
122 group were protected from viral rebound compared to only 20% in the MAG + LT group and 25%  
123 in the mock vaccinated group. A comparison of immune responses in animals that controlled viral  
124 rebound (controllers) to those that exhibited immediate viral rebound during ATI (noncontrollers),  
125 regardless of vaccine group, showed that controllers had higher polyfunctional SIV-specific CD8<sup>+</sup>  
126 T cells in the mesenteric lymph nodes (MLN) and blood. Additional comparisons of controllers

127 and noncontrollers showed the relative response to ART also correlated with viral control during  
128 ATI. Together, these findings highlight an important role for effective ART and mucosal and  
129 systemic CD8<sup>+</sup> T cell responses in controlling viral rebound during ATI. These studies also suggest  
130 that inherent host responses to the virus that occur at the earliest stages of infection may determine  
131 the ability of an individual to respond to antiretroviral drug therapy and therapeutic vaccination.

## 132 **Results:**

### 133 **NHP Study Design:**

134 We previously showed that an SIV therapeutic DNA vaccine adjuvanted with LT induced  
135 protection from viral rebound in >70% of SIV-infected macaques and was associated with higher  
136 peripheral polyfunctional SIV-specific CD8<sup>+</sup> T cells and broader specificity in the mucosal T cell  
137 response [15]. Here, we sought to bolster SIV-specific CD8<sup>+</sup> T cell immunity in the gut-associated  
138 lymphoid tissues (GALT) through adjuvants demonstrated to enhance T cell immunity and  
139 mucosal homing [26, 29, 33], to further test the hypothesis that increasing mucosal immunity will  
140 improve efficacy of therapeutic vaccination.

141 Rhesus macaques were intravenously infected with the highly pathogenic, primary isolate  
142 SIV $\Delta$ B670 [36]. At six weeks post-infection (wpi), animals began ART, consisting of  
143 emtricitabine (FTC), tenofovir (PMPA), and Raltegravir, administered daily, and starting at 32  
144 wpi, macaques received a series of 5 DNA immunizations, spaced 4 weeks apart (Fig 1). Prior to  
145 initiating therapeutic immunizations, we stratified the animals so that each group had comparable  
146 levels of plasma viremia and blood CD4<sup>+</sup> T cell counts (S1 Fig) during acute infection and ART  
147 to balance the effects of pre-existing virological and host factors among all groups.

148 The control group (N = 4) received mock DNA immunizations via particle-mediated  
149 epidermal delivery (PMED) consisting of the vaccine plasmid backbone, without SIV antigens or

150 adjuvants. The MAG + LT group (N = 5) received the MAG vaccine, a plasmid that encodes Gag-  
151 Pol-Env and expresses virus-like particles as described previously [37] co-delivered with plasmids  
152 encoding p57 Gag and the LT adjuvant that we previously showed induces mucosal T cell  
153 responses [15, 25], also via PMED. The MAG + AC group (N = 5) received DNA immunizations  
154 via intradermal injection followed by electroporation. For the first vaccination, animals received  
155 the MAG DNA vaccine co-formulated with plasmids expressing the adjuvants LTA1, IL-12, IL-  
156 33, RALDH2. For the subsequent four vaccinations, each macaque in this group also received a  
157 plasmid co-expressing sPD-1 and sCD80 in addition to the plasmids encoding the adjuvant  
158 combination.

#### 159 **ART reduces viremia and restores CD4 T cells in the periphery:**

160 We and others have shown that therapeutic vaccines are not effective in animals that  
161 respond poorly to ART [15, 38]. In addition, our lab and others have shown that, even when HIV  
162 or SIV is effectively controlled by ART, increased immune dysfunction, regulatory responses and  
163 T cell exhaustion occur that can suppress virus-specific immune responses [39, 40]. To provide  
164 potent suppression of viral replication during ART, we employed a combination of three  
165 antiretrovirals: the integrase inhibitor, Raltegravir, and the non-nucleoside reverse transcriptase  
166 inhibitors FTC and PMPA that were previously shown to effectively suppress SIV infection in  
167 rhesus macaques [41]. However, impaired kidney function due to prolonged treatment with PMPA  
168 necessitated a switch over to tenofovir disoproxil fumarate (TDF) in four animals: A16144 and  
169 A16145 in the MAG + LT group, A16149 in the mock vaccine group, and A16237 in the MAG +  
170 AC group.

171 Prior to starting the immunizations at week 32, 12/14 animals responded well to ART,  
172 reaching viral loads  $\leq 10^3$  viral copies per mL of plasma and resulting in a significant reduction



173 in viral replication ( $P < 0.0001$ , S1 Fig). The ART regimen was also effective at restoring blood  
174 CD4<sup>+</sup> T cell counts. During acute infection, animals experienced a rapid CD4<sup>+</sup> T cell decline that  
175 was significantly restored after initiation of ART ( $P = 0.040$ , S1 Fig). Overall, there was no  
176 significant differences between groups in viral load or peripheral CD4<sup>+</sup> T cell counts during acute  
177 infection and after ART initiation. Two animals exhibited a more modest response to ART, but  
178 still showed a  $10^4$  decrease in their plasma viremia (S1 Fig) and maintained good health and did  
179 not experience disease progression prior to ATI.

180 **Therapeutic vaccination with MAG + AC increases SIV-specific humoral and cellular**  
181 **responses:**

182 To assess the impact of therapeutic vaccination on antibody responses, levels of SIV  
183 gp130-specific IgG were measured by ELISA. Peak antibody titers developed after the first  
184 vaccine dose (34 wpi) in the MAG + LT animals and after the second dose (38 wpi) in the MAG  
185 + AC group, but antibody responses declined by 50 wpi despite the administration of additional  
186 vaccine doses (Fig 2A). Peak antibody responses were significantly higher in the MAG + LT group  
187 ( $P = 0.027$ , Fig 2B) and trended higher in the MAG + AC group ( $P = 0.085$ , Fig 2B) when  
188 compared to the mock-vaccinated group, although there was no difference in peak antibody titer  
189 between the MAG + LT and MAG + AC vaccinated groups (Fig 2B). Studies in HIV+ people  
190 showed strong correlations between HIV-specific antibody-dependent cell-mediated cytotoxicity  
191 (ADCC) with protection from, or delayed progression of, HIV infection [42, 43]. To determine if  
192 our adjuvanted MAG DNA vaccine elicited antibodies that could mediate ADCC, we analyzed  
193 SIV gp130-specific, Fc $\gamma$ RIIIA binding antibodies as a marker for antibody dependent cellular  
194 cytotoxicity (ADCC) [44] by ELISA after the final DNA vaccine dose (50 wpi). The results in Figure

195 2C showed no significant differences in Fc $\gamma$ RIIIA-binding antibody between any of the groups,  
196 indicating that in this setting, the therapeutic vaccines likely had no impact on ADCC activity.

197 To determine the impact of the therapeutic vaccines on T cell responses, SIV-specific T  
198 cells producing IFN- $\gamma$  in response to stimulation with peptide pools spanning p57<sup>Gag</sup> (Gag) and  
199 gp130 (Env) were measured by ELISpot. The median SIV-specific T cell responses in the MAG  
200 + LT group peaked after the first vaccine dose but steadily declined despite additional vaccine  
201 doses (Fig 3A). In contrast, the median T cell responses in the MAG + AC animals increased with  
202 each dose up to the third dose (Fig 3A), resulting in significantly higher responses compared to  
203 the MAG + LT group at 50 wpi, a timepoint that corresponds to two weeks after the final (5<sup>th</sup>)  
204 DNA vaccine dose (P = 0.022, Fig 3B).

205 Both vaccines broadened the SIV-specific IFN- $\gamma$  response after the first dose (34 wpi) when  
206 compared to responses measured prior to vaccination or to the control group (Fig 3C). However,  
207 likely due to the small group sizes, the increases at this timepoint fell short of statistical  
208 significance. Following the final vaccine dose (50 wpi), the breadth of the T cell response had  
209 declined in both groups (Fig 3C), although the MAG + AC vaccine group sustained greater breadth  
210 than both the MAG + LT group (P = 0.020, Fig 3D) and the mock-vaccinated group (P = 0.012,  
211 Fig 3D). Interestingly, the peak IFN- $\gamma$  T cell response post-vaccination was predominantly directed  
212 towards Gag in both vaccine groups, with up to 100% of the IFN- $\gamma$  response targeting Gag  
213 sequences in both the MAG + LT and MAG + AC groups, compared to a maximum of 53% in a  
214 single mock-vaccinated animal (Fig 3E).

215 Env- and Gag-specific CD4<sup>+</sup> and CD8<sup>+</sup> T cell responses were further characterized in the  
216 PBMC and MLN for effector functions, including secretion of IFN- $\gamma$ , TNF- $\alpha$ , and IL-2, and co-

217 expression of CD107a/GranzymeB as markers of cytolytic function by intracellular cytokine  
218 staining (ICS) and flow cytometry (Fig 4A-B).

219 Notably, SIV Gag-specific IFN- $\gamma$ <sup>+</sup> and TNF- $\alpha$ <sup>+</sup> CD8<sup>+</sup> T cell responses transiently increased  
220 after the final vaccination (50 wpi) in only the MAG + AC group, as compared to pre-vaccination  
221 baseline levels (32 wpi) (P = 0.063, Fig 4A), although this trend was not sustained during ATI (P  
222 > 0.99). Throughout the study, there were no significant differences in Gag-specific CD4<sup>+</sup> (S2 Fig)  
223 or CD8<sup>+</sup> T cell responses in the MLN between any of the groups (Fig 4B). In addition, frequencies  
224 of SIV Env-specific CD8<sup>+</sup> and CD4<sup>+</sup> T cell responses in both PBMC (S3 Fig) and MLN (S4 Fig)  
225 were similar throughout the study in all three groups.

226 **Impact of therapeutic vaccination on protection from viral rebound during analytical**  
227 **treatment interruption (ATI):**

228 To determine if therapeutic vaccination improved viral control, ATI was initiated three  
229 weeks after the final vaccine dose (55 wpi), and viral loads were monitored for 6 months.  
230 Containment of median viral loads at or below 1000 copies/mL of plasma during ATI was chosen  
231 as the primary criterion for therapeutic efficacy. This threshold is based on previous studies  
232 showing that rhesus macaques infected with SIV $\Delta$ B670 that maintained viral loads below this level  
233 consistently exhibit long term (>1 year) protection from progression to AIDS [37]. Prior to  
234 stopping ART, all but one animal in the MAG + AC group (A16239) had viral loads of <1000  
235 RNA copies/mL of plasma (Fig 5A-C). During ATI, 60% (3/5) of animals in the MAG + AC group  
236 maintained viremia below 10<sup>3</sup> RNA copies/mL of plasma for 6 months and sustained CD4 counts  
237 above 50% of pre-infection levels, whereas only one animal in the MAG + LT group (1/5, 20%)  
238 and one in the control group (1/4, 25%) exhibited similar viral control and protection from disease  
239 progression (Fig 5A-C). However, due to the low numbers of animals in each group, these

240 differences were not statistically significant. Vaccinated and control animals that exhibited  
241 immediate viral rebound during ATI also showed significant CD4<sup>+</sup> T cell decline during ATI (S5  
242 Fig). Overall, there was no significant difference in protection from viral rebound or mean viral  
243 loads during ATI between the three groups (Fig 5D).

244 **Viral control during ATI is associated with increased Gag-specific CD4 and CD8 T cells in**  
245 **MLN and PBMC:**

246 The variability in viral rebound and viremia during ATI among all animals in this study  
247 enabled further study of immune correlates of viral control. Altogether, within all groups there  
248 were 5 viral controllers and 9 noncontrollers, defined as animals that maintained median viremia  
249 at or below 1000 copies/mL of plasma or greater than 1000 copies/mL of plasma, respectively,  
250 for 5 months after stopping ART (Fig 6A). Viral burden during ATI was significantly different  
251 between controllers and noncontrollers (P = 0.0010, Fig 6B).

252 To determine immune correlates of viral control, we compared frequencies of Gag-specific  
253 CD4<sup>+</sup> and CD8<sup>+</sup> T cell responses expressing IFN- $\gamma$ , TNF $\alpha$ , IL-2, and/or co-expressing the cytolytic  
254 markers CD107a/GranzymeB as detected by flow cytometry in the controllers and noncontrollers.  
255 Immune responses were compared at key timepoints: After the final vaccination and prior to ATI  
256 (50 wpi for both PBMC and MLN) and after viral setpoint was established (62 wpi for PBMC and  
257 66 wpi for MLN). In PBMC, controllers demonstrated a trend towards higher frequencies of  
258 TNF $\alpha$ <sup>+</sup> CD8<sup>+</sup> T cells prior to ATI (50 wpi) (Fig 7A, P = 0.056). Controllers also exhibited  
259 significantly increased frequencies of Gag-specific IFN- $\gamma$ <sup>+</sup> CD8<sup>+</sup> T cells in PBMC during ATI (62  
260 wpi) (Fig 7B, P = 0.0080). However, we did not observe any differences between controllers and  
261 noncontrollers in frequencies of Gag-specific IL-2<sup>+</sup> CD8<sup>+</sup> or CD107a<sup>+</sup>/GzB<sup>+</sup> CD8<sup>+</sup> T cells in  
262 PBMC either prior to or during ATI (S5 Fig, S6 Fig). In MLN, controllers showed significantly

263 increased frequencies of Gag-specific IL-2<sup>+</sup> CD8<sup>+</sup> T cells when compared to noncontrollers (Fig  
264 7C, P = 0.037), although these differences were not sustained during ATI (66 wpi). Additionally,  
265 there were no differences between controllers and noncontrollers in Gag-specific CD8<sup>+</sup> T cells in  
266 MLN expressing IFN- $\gamma$ , TNF $\alpha$ , or co-expressing CD107a<sup>+</sup>/GzB<sup>+</sup> (S5 Fig, S6 Fig).

267 Importantly, higher frequencies of Gag-specific IFN- $\gamma$ <sup>+</sup> and TNF $\alpha$ <sup>+</sup> CD8<sup>+</sup> T cell responses  
268 in PBMC and Gag-specific IL-2<sup>+</sup> CD8<sup>+</sup> T cell responses in the MLN significantly correlated with  
269 lower viral burden during ATI (Fig 7D-F), suggesting that SIV Gag-specific T cell responses in  
270 both the periphery and GALT may contribute to the improved control of virus replication in  
271 controllers.

272 In contrast, we observed no correlations between Gag-specific CD4<sup>+</sup> T cell responses in  
273 PBMC or MLN and viral control (S7 Fig). We also observed that noncontrollers exhibited a  
274 consistent trend towards higher titers of Env-specific IgG both during ART treatment and during  
275 ATI (S8 Fig), implying that these antibody responses were likely driven by virus replication and  
276 that viral control during ATI was primarily mediated by CD8<sup>+</sup> T cell responses.

### 277 **Viral control during ATI is associated with increased polyfunctionality in MLN and PBMC:**

278 To further elucidate the role of SIV-specific CD8<sup>+</sup> T cell responses in viral control, we  
279 next compared the magnitude of the polyfunctional CD8<sup>+</sup> T cell response, as defined by the  
280 frequency of SIV-specific cells specific for either Gag or Env and expressing any three or more of  
281 the cytokines IFN- $\gamma$ , TNF $\alpha$ , IL-2, and/or co-expression of the cytolytic markers  
282 CD107a/GranzymeB. Post-vaccination (50 wpi), controllers demonstrated a trend towards higher  
283 frequencies of polyfunctional CD8<sup>+</sup> T cells expressing three effector functions in the PBMC (P =  
284 0.13, Fig 8A) and MLN (P = 0.18, Fig 8B) compared to noncontrollers. During ATI (62 wpi in  
285 PBMC and 66 wpi in MLN), controllers exhibited significantly increased frequencies of

286 polyfunctional CD8<sup>+</sup> T cells in PBMC (P = 0.036, Fig 8A) and a continued trend towards increased  
287 frequencies of polyfunctional CD8<sup>+</sup> T cells in MLN (P = 0.084, Fig 8B) when compared to  
288 noncontrollers. Furthermore, higher frequencies of polyfunctional CD8<sup>+</sup> T cell responses in both  
289 the PBMC and MLN correlated with lower viral burden during ATI (Fig 8C-F). These results  
290 indicate that polyfunctional CD8<sup>+</sup> T cell responses localized in both the periphery and gut likely  
291 played an integral role in controlling viral recrudescence and protection from disease progression  
292 during ATI.

293 We previously showed that viral control following therapeutic vaccination occurred only  
294 in animals that developed very low to undetectable viremia during ART treatment [15, 38]. To  
295 determine if acute viral replication or the response to ART influenced viral control during ATI, we  
296 compared viral loads measured during acute infection (0-6 wpi) or during ART (6-55 wpi) in  
297 controllers and noncontrollers. Controllers demonstrated a trend toward lower viral burden during  
298 acute infection (P = 0.11, Fig 9A) and had significantly lower viral burden while on ART (P =  
299 0.014, Fig 9A) when compared to noncontrollers. Furthermore, the level of viral control during  
300 ATI significantly correlated with viral burden during acute infection (P = 0.0078, Fig 9B) and  
301 during ART treatment (P = 0.00040, Fig 9C). Together, these data suggested that baseline factors  
302 influence viral replication during acute infection, that in turn determines an SIV-infected animal's  
303 ability to respond to ART. ART responsiveness then potentially affects the ability of the SIV-  
304 infected animals to develop polyfunctional CD8<sup>+</sup> T cell responses and control viral replication  
305 during ATI.

306 To investigate this theory, we assessed a number of baseline immune factors, including  
307 CD4<sup>+</sup> T cells, T helper 17 (Th17) and T regulatory (Treg) cells in the colon, that we hypothesized  
308 could influence the extent of acute viral replication. In particular, preferential depletion of Th17

309 cells in the gut during acute infection corresponds to a loss of gut integrity, leading to microbial  
310 translocation, immune activation, and disease progression [45, 46]. In contrast, the role of Treg  
311 cells in HIV pathogenesis is not well characterized, but they may contribute to viral replication by  
312 suppressing HIV-specific CD8<sup>+</sup> T cell activity [47]. Alternatively, Tregs may decrease chronic  
313 immune activation, thus slowing disease progression [48]. Ultimately, their role in HIV disease  
314 progression may depend on the stage of infection and the relative proportion of other T cell subsets.  
315 In the colon, we observed a correlation between greater CD4<sup>+</sup> T cell frequencies (P = 0.017) or  
316 lower Th17/Treg ratios (P = 0.0020) with lower viral burden during ATI (Fig 9D-E). Upon further  
317 examination, neither the baseline frequencies of Th17 (P = 0.22) nor Treg (P = 0.16) cells alone  
318 correlated with viral burden during ATI (S9 Fig). Collectively, this data suggests that during the  
319 early stages of infection mucosal T cells are necessary to maintain gut homeostasis and prevent  
320 immune dysfunction.

### 321 **Discussion:**

322 The primary goal of this study was to determine if a multi-antigen DNA vaccine (MAG)  
323 that we previously showed imparted viral control when tested as a prophylactic DNA vaccine  
324 against SIV infection [37] could be employed as a therapeutic vaccine, and if a novel genetic  
325 adjuvant combination (AC) could improve immunogenicity and therapeutic efficacy of this  
326 vaccine. In support of this, animals that received the multi-antigen vaccine and adjuvant  
327 combination (MAG + AC) exhibited significant increases in the magnitude and breadth of IFN- $\gamma$   
328 T cell responses as measured by ELISpot when compared to a vaccine group that received MAG  
329 with only a single adjuvant (LT). Additionally, the MAG + AC group exhibited a trend towards  
330 elevated Gag-specific TNF $\alpha$  and IFN- $\gamma$  CD8<sup>+</sup> T cell responses in the blood post-vaccination, an  
331 outcome that is consistent with our prophylactic vaccine study employing the same vaccine [37]

332 and other vaccine trials in NHP and mice using the IL-12 and IL-33 adjuvants [26, 29, 49].  
333 However, the addition of the RALDH2 adjuvant to the combination did not increase SIV-specific  
334 T cell responses in the GALT, as it did in mice [33], possibly due to SIV infection causing  
335 significant mucosal immune dysfunction that may have interfered with the effects of this adjuvant.  
336 Three out of five MAG + AC animals were protected from viral rebound (60%), although due to  
337 the small group sizes, this outcome was not statistically different from the controls. Furthermore,  
338 since we were unable to include a control group receiving the full adjuvant combination in the  
339 absence of a vaccine, we cannot rule out the possibility that the combined effects of the adjuvant  
340 combination may have stimulated nonspecific immune responses that contributed to improved  
341 viral control during ATI in these three animals, similar to what was observed by Sui *et al.* in 2010  
342 [50]. We additionally were unable to include a control group to account for the potential  
343 differences in MAG immunogenicity resulting from vaccine administration using Gene Gun versus  
344 intradermal electroporation. Both vaccine modalities have been shown to enhance DNA vaccine  
345 immunogenicity [51, 52], but we cannot rule out that the differences between the methods of  
346 vaccine administration may have influenced immunogenicity between the MAG + LT group and  
347 the MAG + AC group.

348 Overall, five animals from all groups controlled viral rebound and were protected from  
349 progression to AIDS, in contrast to nine animals that exhibited immediate viral rebound during  
350 ATI. This variability in viral control during ATI enabled analysis of immune correlates of  
351 protection from viral rebound. We found that polyfunctional, SIV-specific CD8<sup>+</sup> T cells in the  
352 MLN measured prior to stopping ART inversely correlated with viral loads during ATI, a finding  
353 that supports our previous study where we found that broadly specific IFN- $\gamma$  T cell responses  
354 localized in the gut, but not the blood, significantly correlated with protection from viral rebound



355 [15]. Notably, although we and other groups in addition to ours have demonstrated that robust,  
356 virus-specific CD8<sup>+</sup> T cell responses in the blood are associated with control of viral replication  
357 during ATI, and it is well known that polyfunctional, virus-specific CD8 T cells in the blood are  
358 associated with elite control of HIV and SIV, this study is the first to show an association between  
359 polyfunctional CD8 T cells in the gut-associated lymphoid tissue (GALT) and control of viral  
360 replication during ATI. Together, these studies provide strong evidence that an effective  
361 therapeutic vaccine may need to induce not only broadly specific but also polyfunctional mucosal  
362 CD8<sup>+</sup> T cells to effectively control reactivating virus during ATI in this viral reservoir. These data  
363 also further corroborate our previous study, where we showed that SIV-specific TNF $\alpha$ <sup>+</sup> CD107a<sup>+</sup>  
364 CD8<sup>+</sup> T cells in the blood were associated with protection from viral rebound [15].

365         While our data clearly show an impact of the vaccines on immune responses and a  
366 protective role for mucosal and systemic polyfunctional CD8<sup>+</sup> T cell responses, the precise  
367 mechanisms underlying viral control during ATI in the controllers in this study and the factors that  
368 influenced failure to control virus during ATI in the noncontrollers are not clear. An important  
369 variable in this study is the relative response to the antiretroviral drug therapy. We previously  
370 showed that animals that respond poorly to ART also responded poorly to therapeutic vaccination  
371 [15, 38], and our results here showing that the controllers had lower viral loads than the  
372 noncontrollers during ART are consistent with these findings. It is notable that the controllers also  
373 exhibited a trend toward lower acute viral loads when compared to the noncontrollers, although  
374 this was not statistically significant. This suggests that virus-host interactions that occurred prior  
375 to ART initiation may have impacted ART efficiency which, in turn, altered the efficacy of  
376 therapeutic vaccination. Indeed, what occurs during acute infection, particularly in the mucosa,  
377 may determine how well an animal's viral loads are controlled by ART, thereby influencing the

378 response to therapeutic vaccination and its ability to enhance immune control of viremia during  
379 ATI. In support of this, we showed that lower frequencies of colonic CD4<sup>+</sup> T cells and higher ratios  
380 of Th17 to Treg cells pre-infection correlated with higher viral burden during ATI. This could  
381 indicate that although Th17 cells are important for maintenance of gut barrier function, they could  
382 act as early viral targets of infection. Additionally and alternatively, lower proportions of  
383 immunosuppressive Treg cells in the gut mucosa may allow for greater T-cell proliferation and  
384 promote early viral replication in the GALT. Meanwhile, having an larger overall population of  
385 mucosal CD4<sup>+</sup> T cells at baseline could indicate that an animal is better able to cope with CD4<sup>+</sup> T  
386 cell depletion and may experience less immune dysfunction as a result of viral replication. We also  
387 previously showed that SIV-infected rhesus macaques that were unable to maintain their mucosal  
388 Th17/Treg ratios during acute infection and prior to ART initiation, exhibited a significantly lower  
389 response to ART [38]. This suggests that disruption of mucosal Th17 and Treg homeostasis during  
390 acute infection could also impede an animal's ability to respond to subsequent therapeutic  
391 interventions.

392 In summary, the significant correlation between higher polyfunctional CD8<sup>+</sup> T cells in the  
393 MLN and lower viral burden during ATI shown here provides new insight into a role for potent,  
394 polyfunctional CD8<sup>+</sup> T cell responses in the GALT in controlling viral rebound, and provides  
395 further evidence supporting development of therapeutic HIV vaccines that can induce mucosal  
396 immunity. Although we did not observe a significant impact of the MAG + AC vaccine on mucosal  
397 immunity, the vaccine effectively increased the magnitude and breadth of the IFN- $\gamma$  T cell response  
398 in the blood, suggesting that the adjuvant combination could be a useful adjuvant for other T cell-  
399 based vaccines where peripheral T cell responses are sufficient for protection. Studies are  
400 underway to further refine this adjuvant combination to increase its ability to induce mucosal

401 immune responses for future therapeutic vaccine studies. Toward the goal of developing an  
402 effective therapeutic vaccine for HIV, further studies are needed to define additional host factors  
403 and immune mechanisms induced during acute infection that influence the relative response to  
404 ART and the immunogenicity and efficacy of therapeutic vaccines.

405 **Methods:**

406 **Ethics Statement:**

407 Male, adult rhesus macaques (*Macaca mulatta*) of Indian origin were used for this study.  
408 These animals were housed at the Washington National Primate Research Center (WaNPRC),  
409 which is accredited by the American Association for the Accreditation of Laboratory Animal Care  
410 International (AAALAC). At the WaNPRC, animals received the highest standard of care from a  
411 team of highly trained, experienced animal technicians, veterinarians, and animal behavior  
412 specialists, who provided daily environmental enrichment and monitored for any signs of distress  
413 or abnormal behavior. All biopsies, surgeries, and blood draws were performed under ketamine  
414 anesthesia and any continuous discomfort or pain was alleviated at the discretion of the veterinary  
415 staff. Following SIV infection, animals were monitored for signs of disease progression, including  
416 CD4<sup>+</sup> T cell count, weight, anemia, and opportunistic infections, at least monthly. The University  
417 of Washington's Institutional Animal Care and Use Committee (IACUC) approved all experiments  
418 in these macaques.

419 **MHC-I and TRIM5 typing:**

420 All macaques were major histocompatibility class I (MHC-1) typed for 32 alleles,  
421 including A\*01, A\*02, B\*08, B\*17. DNA was extracted using the Roche© MagnaPure™ system  
422 and analyzed via PCR by Dr. David Watkins and the MHC Genotyping Service at the University  
423 of Miami, as previously described [53, 54]. All animals were also tested for TRIM5 haplotypes,  
424 including TFP, Q, and CypA, by PCR of genomic DNA by Dr. David O'Connor at the Wisconsin  
425 National Primate Research Center (WNPRC). Animals with permissive TRIM5 genotypes were  
426 excluded from the study, as were animals possessing restrictive TRIM5 genotypes and MHC  
427 haplotypes associated with increased viral control.

428 **Viral Challenge and AIDS Monitoring:**

429 Rhesus macaques were challenged intravenously with 100 TCID<sub>50</sub> of cryopreserved  
430 SIVΔB670, diluted in 1 milliliter of RPMI. Simian AIDS was defined according to WaNPRC  
431 guidelines, namely: weight loss exceeding 15 percent, anemia, CD4<sup>+</sup> T cell decline to less than  
432 200 cells per microliter, and presence of opportunistic infections. These criteria were evaluated at  
433 least monthly, but if two or more of the criteria were met, these measurements were evaluated  
434 more frequently. If veterinary staff determined that an animal had reached AIDS-defining criteria,  
435 humane euthanasia was performed as an early endpoint.

436 **Quantification of Plasma Viral Load and Complete Blood Counts (CBCs) and Serum**  
437 **Chemistries:**

438 The Virology Core at the WaNPRC, led by Dr. Shiu-Lok Hu and Dr. Patricia Firpo,  
439 quantified viral RNA in the plasma of SIVΔB670-infected animals using a real time quantitative  
440 PCR (RT-q-PCR) assay. The Virology Core also determined complete blood counts, using a  
441 Beckman Coulter® AC\*<sup>T</sup>™ 5diff hematology analyzer as described previously [55].

442 **Antiretroviral Therapy:**

443 All SIV-infected animals were treated with a combination of 3 antiretroviral therapies:  
444 9-(2-Phosphoryl-methoxypropyl) adenine (PMPA or tenofovir; Gilead Sciences, Foster City,  
445 CA) was resuspended in phosphate-buffered saline (PBS) at 120 mg/mL. To completely dissolve  
446 the PMPA, 1 molar NaOH was added until the pH reached 7.4-7.8. The solution was then filter  
447 purified, injected into sterile glass vials, and stored at -20°C. PMPA was administered  
448 subcutaneously in a once-daily dose of 20 milligrams per kilogram (mg/kg) of animal weight.  
449 2',3'-dideoxy-5-fluoro-3'-thiacytidine (FTC or emtricitabine, Gilead Sciences, Foster City, CA)  
450 was resuspended in PBS at 120 mg/mL. The mixture was heated at 37°C with constant stirring

451 until completely dissolved, and stored at 4°C. FTC was administered once per-day subcutaneously  
452 at 30 mg/kg during the first month of ART (weeks 6-10 post-infection) and at 20 mg/kg once per-  
453 day for the remainder of ART. Raltegravir (Isentress, Merck & Co., Kenilworth, NJ) was given  
454 orally at 250 mg/animal twice daily for the first month of ART, and at 150 mg/animal twice daily  
455 for the remainder of ART.

456 Trained animal technicians administered all ART drugs, and veterinary staff closely  
457 monitored animals for adverse side effects, which were treated immediately at their discretion.  
458 A few animals experienced elevated creatinine levels due to prolonged treatment with PMPA, so  
459 these animals were promptly switched to tenofovir disoproxil fumarate (TDF), a prodrug of  
460 tenofovir that is metabolized to PMPA.

461 TDF was resuspended in a solution of 15% Kleptose in water, at a concentration of 10.2  
462 mg/mL, and pH adjusted to 4.1-4.3. The solution was then filter purified and stored at 4°C or  
463 frozen at -20°C for long-term storage. TDF was administered once per-day subcutaneously at 5.2  
464 mg/kg for the duration of ART.

## 465 **DNA Vaccinations:**

### 466 **I. Particle-Mediated Epidermal Delivery (PMED, or Gene Gun)**

467 Vaccine and adjuvant plasmids were formulated onto gold particles as previously  
468 described, and administered using the PowderJect® XR1 gene delivery device (PowderJect  
469 Vaccines, Inc., Middleton, WI) [15]. Fur was shaved off of vaccination sites, which were then  
470 swabbed with alcohol prior to vaccine administration. Macaques were vaccinated over 16  
471 epidermal sites along the lower abdomen and over the inguinal lymph nodes. Each animal received  
472 32 µg of the MAG or Gag DNA vaccine co-formulated with 3.2 µg of plasmid expressing the LT  
473 adjuvant (2 µg MAG or Gag DNA + 0.2 µg LT per site).

## 474 **II. Intradermal Electroporation (ID EP)**

475           MAG, Gag, and adjuvant plasmids (rhIL-12, LTA1, expressed on one plasmid each, and  
476 hRALDH2/rhIL-33 and rhPD-1/rhCD80 co-expressed on one plasmid each) were prepared in a  
477 citrate buffer and administered via intradermal injection into the dermis above the quadriceps  
478 muscle on each leg. For the first vaccination, each macaque received 900 µg of the MAG or Gag  
479 DNA vaccine co-formulated with 900 µg of DNA expressing hRALDH2/rhIL-33, 900 µg of DNA  
480 expressing rhIL-12, and 162 µg of DNA expressing LTA1, evenly distributed over 3 injection sites  
481 per leg (300 µg MAG or Gag + 300 µg hRALDH2/rhIL-33 + 300 µg rhIL-12 + 54 µg LTA1 per  
482 site). For each subsequent vaccination, each macaque received 900 µg of the MAG or Gag DNA  
483 vaccine co-formulated with 900 µg of DNA expressing hRALDH2/rhIL-33, 900 µg of DNA  
484 expressing rhIL-12, 975 µg of DNA expressing rhPD-1/rhCD80 and 162 µg of DNA expressing  
485 LTA1, evenly distributed over 4 injection sites per leg (225 µg MAG or Gag + 225 µg  
486 hRALDH2/rhIL-33 + 225 µg rhIL-12 + 244 µg rhPD-1/CD80 + 40.5 µg LTA1 per site). Prior to  
487 each vaccination, fur covering the vaccination site was shaved and the skin was swabbed with  
488 alcohol. Following injection of vaccine and adjuvant DNA, electrical pulses were delivered using  
489 the Agile Pulse device (BTX, Holliston, MA) according to the device manufacturer's instructions.

### 490 **Luminex®:**

491 To quantify the levels of 23 cytokines in the plasma of SIV-infected animals, the Milliplex® Map  
492 Non-Human Primate Cytokine Magnetic Bead Panel Kit (EMD Millipore Corporation, Billerica,  
493 MA) was used, according to the manufacturer's instructions.

### 494 **Enzyme-Linked Immunospot Assay (ELISpot):**

495           ELISpot was performed to quantify the frequency of SIV-specific IFN-γ spot-forming cells  
496 (SFC) in accordance with previously described methods. In brief, PBMCs were isolated from

497 whole blood via density gradient separation and stimulated with pools of 15mer peptides  
498 overlapping by 11 amino acids and corresponding to the following SIV proteins: Gag, Env, Pol,  
499 Vif, Vpr, Rev, Nef, and Tat. As a negative control, samples were stimulated with dimethyl  
500 sulfoxide (DMSO). For a positive control, samples were stimulated with concanavalin A (Con A).  
501 Samples were considered positive if peptide-specific responses were at least twice that of the  
502 negative control plus at least 0.01% after background (DMSO) subtraction.

503 **Enzyme-Linked Immunosorbent Assay (ELISA) for analysis of antibody responses and**  
504 **microbial translocation:**

505 SIV Env-specific IgG binding antibody was measured by ELISA, as previously described.  
506 In brief, 1 $\mu$ g/mL SIVmac239 gp130 (NIH AIDS Reagent Program) was used as the capture  
507 antigen, and a rabbit anti-IgG (heavy and light chains conjugated to horse radish peroxidase) was  
508 used to detect antibody bound to the capture antigen.

509 IgG binding to Fc $\gamma$ R3a was measured using a modified ELISA protocol. SIVmac239  
510 gp130 (NIH AIDS Reagent Program) was again used as the capture antigen, and serial dilutions  
511 of macaque plasma in Blotto buffer (20x TRIS-buffered saline and 2% Tween20 diluted to 1x with  
512 ddH<sub>2</sub>O and 5% non-fat milk) were plated in duplicate and incubated for one hour at room  
513 temperature. While the experimental plate was incubating, 24 $\mu$ L of 250 $\mu$ g/mL biotinylated  
514 Fc $\gamma$ R3a was mixed with 5 $\mu$ L of 0.5mg/mL of Streptavidin poly-HRP in 3.3mL Blotto buffer to  
515 bind the HRP probe to the recombinant Fc $\gamma$ R3a. This mixture was used in place of a detection  
516 antibody to determine the concentration of Env-specific IgG that binds to Fc $\gamma$ R3a. The Fc $\gamma$ R3a  
517 mixture was incubated for one hour at room temperature on a rotator, and then diluted 1:3 with  
518 Blotto buffer. Once the Fc $\gamma$ R3a mixture was prepared and the experimental plate had finished its  
519 one hour incubation, the plate was washed three times with Blotto buffer, and 100 $\mu$ L of the Fc $\gamma$ R3a



520 mixture was added. The plate was then incubated once more for one hour, then washed three times  
521 with Blotto buffer, developed using the SureBlue™ TMB Microwell Peroxidase Substrate Kit  
522 (KPL Inc.) and neutralized after 10 minutes with 1N H<sub>2</sub>SO<sub>4</sub>. The optical density of the samples  
523 was measured using an EMax® ELISA Microplate Reader with SoftMax® Pro software  
524 (Molecular Devices©, Sunnyvale, California). Samples were background subtracted from negative  
525 control wells to which no macaque plasma was added, and a positive response was defined as  
526 greater than two standard deviations above the mean OD of the negative control wells.

### 527 **Intracellular Cytokine Staining (ICS) and immunophenotyping of T cell exhaustion:**

528 Cryopreserved PBMCs and MLN lymphocytes were thawed and rested at 37°C and 5%  
529 CO<sub>2</sub> for 6 hours before stimulation with DMSO, PMA (Sigma-Aldrich®)/Ionomycin (Life  
530 Technologies®), or SIV Gag or Env peptides (1 µg/mL) for 1 hour with CD107a PECy5  
531 (eBioH4A3, BioLegend) in R10 media before adding 1 mg/mL of Brefeldin A (Sigma-Aldrich®).  
532 Cells were stimulated overnight (approximately 14 hours) at 37°C and 5% CO<sub>2</sub>. After stimulation,  
533 cells were washed with PBS and stained using LIVE/DEAD® Aqua (ThermoFisher®) amine  
534 reactive dye to distinguish live cells, then surface stained with CD3 Brilliant Violet (BV) 711  
535 (Sp34-2, BD Biosciences), CD4 PerCPCy5.5 (L200, BD Biosciences), CD8 APC-Cy7 (RPA-T8,  
536 BD Biosciences), CD28 PE-CF594 (CD28.2, BD Biosciences), CD95 BV421 (Dx2, BD), PD-1  
537 BV605 (EHI12.2H7, BioLegend), and TIGIT PerCP-eFluor710 (MBSA43, ThermoFisher®), in  
538 Brilliant Stain buffer (BD Biosciences). Cells were then permeabilized with Cytotfix/Cytoperm  
539 (BD Biosciences) and stained for intracellular cytokines with an antibody cocktail of IFN $\gamma$  FITC  
540 (B27, BD Biosciences), TNF $\alpha$  PE-Cy8 (Mab11, BD Biosciences), IL-2 PE (MQ1-17H12, BD  
541 Biosciences), and GranzymeB APC (GB12, ThermoFisher®), in Perm/Wash™ Buffer (BD  
542 Biosciences). Finally, cells were washed with Perm/Wash™ Buffer (BD Biosciences) and fixed

543 with 1% paraformaldehyde (Sigma). Data was collected on an LSR II (BD Biosciences) and  
544 analyzed using FlowJo software (Version 9.7.6, Treestar Inc., Ashland, Oregon).

545 To evaluate T cell exhaustion, cryopreserved PBMCs and MLN lymphocytes were thawed  
546 and washed with R10, then stained with LIVE/DEAD® Aqua (ThermoFisher®). Cells were  
547 subsequently surface stained with an antibody cocktail consisting of CD3 BV 650 (Sp34-2, BD  
548 Biosciences), CD4 BV605 (OKT4, BD Biosciences), CD25 APC-R700 (2A3, BD), CD8 BV710  
549 (RPA-T8, BD Biosciences), CD28 PE-CF594 (CD28.2, BD Biosciences), CD95 PerCP-eFluor710  
550 (Dx2, ThermoFisher®), PD-1 BV785 (EHI12.2H7, BioLegend), TIGIT FITC (MBSA43,  
551 ThermoFisher®), SLAM BV421 (A12, BD), CTLA-4 PECy5 (BNI3, BD), and LAG-3 PE  
552 (polyclonal, R&D) in Brilliant Stain buffer (BD Biosciences). Fluorescence minus one (FMO)  
553 controls were included for each of the exhaustion markers, PD-1, TIGIT, SLAM, CTLA-4, and  
554 LAG-3, to more accurately determine their expression. Cells were subsequently washed with  
555 Brilliant Stain buffer (BD Biosciences) and fixed with 1% paraformaldehyde (Sigma). Finally,  
556 data was collected using an LSR II (BD Biosciences) and analyzed on FlowJo software (Version  
557 9.7.6, Treestar Inc., Ashland, Oregon).

#### 558 **Intracellular Cytokine Staining (ICS) of gut mucosa:**

559 Intraepithelial and lamina propria lymphocytes were isolated from colon biopsies and  
560 stimulated in the presence of brefeldin A (Sigma) and CD107a antibody (eBioH4A3; eBioscience),  
561 as previously described [40]. Cell were assessed for viability (Life Technologies) and stained using  
562 surface and intracellular/intranuclear markers as previously described [40]. All samples were  
563 acquired on an LSRII (BD Biosciences) and analyzed using FlowJo software version 9.9.4  
564 (FlowJo; LLC). Gating schemes are described previously [40]. Briefly, CD4<sup>+</sup> Tregs were  
565 designated by coexpression of CD25 and FoxP3 and Th17 cells were defiend by IL-17 production.

566 **Statistical Analyses:**

567           Statistical differences between multiple groups were calculated using a Dunn's multiple  
568 comparisons test, while statistical comparisons between two groups were determined using a two-  
569 sided Mann-Whitney. Statistical differences in viral load, CD4<sup>+</sup>T cell counts, or immune responses  
570 between timepoints was calculated using a Wilcoxon matched-pairs signed rank test. Viral burden  
571 was determined by calculating the area under the curve of each animal's viral load graph.  
572 Correlations between immune responses and viral burden were determined by a Spearman's rank  
573 correlation test. When necessary, P values were adjusted for multiple comparisons using the  
574 Benjamini-Hochberg method. A P value of  $\leq 0.05$  was considered significant for each test. All  
575 calculations were performed using GraphPad Prism software (Version 7, GraphPad Software, San  
576 Diego, CA).

577

578 **Acknowledgements:**

579           The authors would like to thank all the veterinary and research support staff of the  
580 Washington National Primate Research Center (WaNPRC), with special thanks given to Solomon  
581 Wangari, Drew May, Dr. Jennifer Lane, Dr. Cassie Moats, Dr. Jeremy Smedley, and Dr. Robert  
582 Murnane. We also wish to thank Thomas Lewis and Dr. Patience Murapa for their early work in  
583 determining the optimal adjuvant combination for use in this study. Gag and Env peptides and SIV  
584 gp130 proteins were generously provided by the NIH AIDS Research and Reference Reagent  
585 Program.

586 **References:**

- 587 1. Pau AK, George JM. Antiretroviral therapy: current drugs. *Infect Dis Clin North Am.*  
588 2014;28(3):371-402. Epub 2014/08/26. doi: 10.1016/j.idc.2014.06.001. PubMed PMID:  
589 25151562; PubMed Central PMCID: PMC4143801.
- 590 2. Ho YC, Shan L, Hosmane NN, Wang J, Laskey SB, Rosenbloom DI, et al. Replication-  
591 competent noninduced proviruses in the latent reservoir increase barrier to HIV-1 cure. *Cell.*  
592 2013;155(3):540-51. Epub 2013/11/19. doi: 10.1016/j.cell.2013.09.020. PubMed PMID:  
593 24243014; PubMed Central PMCID: PMC3896327.
- 594 3. Saez-Cirion A, Bacchus C, Hocqueloux L, Avettand-Fenoel V, Girault I, Lecuroux C, et  
595 al. Post-treatment HIV-1 controllers with a long-term virological remission after the interruption  
596 of early initiated antiretroviral therapy ANRS VISCONTI Study. *PLoS Pathog.*  
597 2013;9(3):e1003211. Epub 2013/03/22. doi: 10.1371/journal.ppat.1003211. PubMed PMID:  
598 23516360; PubMed Central PMCID: PMC3597518.
- 599 4. Schackman BR, Gebo KA, Walensky RP, Losina E, Muccio T, Sax PE, et al. The lifetime  
600 cost of current human immunodeficiency virus care in the United States. *Med Care.*  
601 2006;44(11):990-7. Epub 2006/10/26. doi: 10.1097/01.mlr.0000228021.89490.2a. PubMed  
602 PMID: 17063130.
- 603 5. Ammassari A, Murri R, Pezzotti P, Trotta MP, Ravasio L, De Longis P, et al. Self-reported  
604 symptoms and medication side effects influence adherence to highly active antiretroviral therapy  
605 in persons with HIV infection. *J Acquir Immune Defic Syndr.* 2001;28(5):445-9. Epub  
606 2001/12/18. doi: 10.1097/00042560-200112150-00006. PubMed PMID: 11744832.
- 607 6. Neuhaus J, Jacobs DR, Jr., Baker JV, Calmy A, Duprez D, La Rosa A, et al. Markers of  
608 inflammation, coagulation, and renal function are elevated in adults with HIV infection. *J Infect*

- 609 Dis. 2010;201(12):1788-95. Epub 2010/05/08. doi: 10.1086/652749. PubMed PMID: 20446848;  
610 PubMed Central PMCID: PMCPMC2872049.
- 611 7. Zicari S, Sessa L, Cotugno N, Ruggiero A, Morrocchi E, Concato C, et al. Immune  
612 Activation, Inflammation, and Non-AIDS Co-Morbidities in HIV-Infected Patients under Long-  
613 Term ART. *Viruses*. 2019;11(3). Epub 2019/03/02. doi: 10.3390/v11030200. PubMed PMID:  
614 30818749; PubMed Central PMCID: PMCPMC6466530.
- 615 8. Pollard RB, Rockstroh JK, Pantaleo G, Asmuth DM, Peters B, Lazzarin A, et al. Safety  
616 and efficacy of the peptide-based therapeutic vaccine for HIV-1, Vacc-4x: a phase 2 randomised,  
617 double-blind, placebo-controlled trial. *Lancet Infect Dis*. 2014;14(4):291-300. Epub 2014/02/15.  
618 doi: 10.1016/S1473-3099(13)70343-8. PubMed PMID: 24525316.
- 619 9. Loret EP, Darque A, Jouve E, Loret EA, Nicolino-Brunet C, Morange S, et al. Intradermal  
620 injection of a Tat Oyi-based therapeutic HIV vaccine reduces of 1.5 log copies/mL the HIV RNA  
621 rebound median and no HIV DNA rebound following cART interruption in a phase I/II  
622 randomized controlled clinical trial. *Retrovirology*. 2016;13:21. Epub 2016/04/03. doi:  
623 10.1186/s12977-016-0251-3. PubMed PMID: 27036656; PubMed Central PMCID:  
624 PMCPMC4818470.
- 625 10. Tung FY, Tung JK, Pallikkuth S, Pahwa S, Fischl MA. A therapeutic HIV-1 vaccine  
626 enhances anti-HIV-1 immune responses in patients under highly active antiretroviral therapy.  
627 *Vaccine*. 2016;34(19):2225-32. Epub 2016/03/24. doi: 10.1016/j.vaccine.2016.03.021. PubMed  
628 PMID: 27002500.
- 629 11. Garcia F, Climent N, Guardo AC, Gil C, Leon A, Autran B, et al. A dendritic cell-based  
630 vaccine elicits T cell responses associated with control of HIV-1 replication. *Sci Transl Med*.

- 631 2013;5(166):166ra2. Epub 2013/01/04. doi: 10.1126/scitranslmed.3004682. PubMed PMID:  
632 23283367.
- 633 12. Borducchi EN, Cabral C, Stephenson KE, Liu J, Abbink P, Ng'ang'a D, et al. Ad26/MVA  
634 therapeutic vaccination with TLR7 stimulation in SIV-infected rhesus monkeys. *Nature*.  
635 2016;540(7632):284-7. Epub 2016/11/15. doi: 10.1038/nature20583. PubMed PMID: 27841870;  
636 PubMed Central PMCID: PMC5145754.
- 637 13. Hansen SG, Ford JC, Lewis MS, Ventura AB, Hughes CM, Coyne-Johnson L, et al.  
638 Profound early control of highly pathogenic SIV by an effector memory T-cell vaccine. *Nature*.  
639 2011;473(7348):523-7. Epub 2011/05/13. doi: 10.1038/nature10003. PubMed PMID: 21562493;  
640 PubMed Central PMCID: PMC3102768.
- 641 14. Kalams SA, Parker S, Jin X, Elizaga M, Metch B, Wang M, et al. Safety and  
642 immunogenicity of an HIV-1 gag DNA vaccine with or without IL-12 and/or IL-15 plasmid  
643 cytokine adjuvant in healthy, HIV-1 uninfected adults. *PLoS One*. 2012;7(1):e29231. Epub  
644 2012/01/14. doi: 10.1371/journal.pone.0029231. PubMed PMID: 22242162; PubMed Central  
645 PMCID: PMC3252307.
- 646 15. Fuller DH, Rajakumar P, Che JW, Narendran A, Nyaundi J, Michael H, et al. Therapeutic  
647 DNA vaccine induces broad T cell responses in the gut and sustained protection from viral rebound  
648 and AIDS in SIV-infected rhesus macaques. *PLoS One*. 2012;7(3):e33715. Epub 2012/03/24. doi:  
649 10.1371/journal.pone.0033715. PubMed PMID: 22442716; PubMed Central PMCID:  
650 PMC3307760.
- 651 16. Sneller MC, Justement JS, Gittens KR, Petrone ME, Clarridge KE, Proschan MA, et al. A  
652 randomized controlled safety/efficacy trial of therapeutic vaccination in HIV-infected individuals

- 653 who initiated antiretroviral therapy early in infection. *Sci Transl Med*. 2017;9(419). Epub  
654 2017/12/08. doi: 10.1126/scitranslmed.aan8848. PubMed PMID: 29212716.
- 655 17. Larijani MS, Ramezani A, Sadat SM. Updated Studies on the Development of HIV  
656 Therapeutic Vaccine. *Curr HIV Res*. 2019;17(2):75-84. Epub 2019/06/19. doi:  
657 10.2174/1570162X17666190618160608. PubMed PMID: 31210114.
- 658 18. Brenchley JM, Schacker TW, Ruff LE, Price DA, Taylor JH, Beilman GJ, et al. CD4+ T  
659 cell depletion during all stages of HIV disease occurs predominantly in the gastrointestinal tract. *J*  
660 *Exp Med*. 2004;200(6):749-59. Epub 2004/09/15. doi: 10.1084/jem.20040874. PubMed PMID:  
661 15365096; PubMed Central PMCID: PMCPMC2211962.
- 662 19. Mehandru S, Poles MA, Tenner-Racz K, Horowitz A, Hurley A, Hogan C, et al. Primary  
663 HIV-1 infection is associated with preferential depletion of CD4+ T lymphocytes from effector  
664 sites in the gastrointestinal tract. *J Exp Med*. 2004;200(6):761-70. Epub 2004/09/15. doi:  
665 10.1084/jem.20041196. PubMed PMID: 15365095; PubMed Central PMCID:  
666 PMCPMC2211967.
- 667 20. Veazey RS, DeMaria M, Chalifoux LV, Shvetz DE, Pauley DR, Knight HL, et al.  
668 Gastrointestinal tract as a major site of CD4+ T cell depletion and viral replication in SIV infection.  
669 *Science*. 1998;280(5362):427-31. Epub 1998/05/09. doi: 10.1126/science.280.5362.427. PubMed  
670 PMID: 9545219.
- 671 21. Brenchley JM, Paiardini M, Knox KS, Asher AI, Cervasi B, Asher TE, et al. Differential  
672 Th17 CD4 T-cell depletion in pathogenic and nonpathogenic lentiviral infections. *Blood*.  
673 2008;112(7):2826-35. Epub 2008/07/31. doi: 10.1182/blood-2008-05-159301. PubMed PMID:  
674 18664624; PubMed Central PMCID: PMCPMC2556618.



- 675 22. Brenchley JM, Price DA, Schacker TW, Asher TE, Silvestri G, Rao S, et al. Microbial  
676 translocation is a cause of systemic immune activation in chronic HIV infection. *Nat Med.*  
677 2006;12(12):1365-71. Epub 2006/11/23. doi: 10.1038/nm1511. PubMed PMID: 17115046.
- 678 23. Douek D. HIV disease progression: immune activation, microbes, and a leaky gut. *Top*  
679 *HIV Med.* 2007;15(4):114-7. Epub 2007/08/28. PubMed PMID: 17720995.
- 680 24. Bagley KC, Abdelwahab SF, Tuskan RG, Fouts TR, Lewis GK. Cholera toxin and heat-  
681 labile enterotoxin activate human monocyte-derived dendritic cells and dominantly inhibit  
682 cytokine production through a cyclic AMP-dependent pathway. *Infect Immun.* 2002;70(10):5533-  
683 9. Epub 2002/09/14. doi: 10.1128/iai.70.10.5533-5539.2002. PubMed PMID: 12228279; PubMed  
684 Central PMCID: PMCPMC128358.
- 685 25. Bagley K, Xu R, Ota-Setlik A, Egan M, Schwartz J, Fouts T. The catalytic A1 domains of  
686 cholera toxin and heat-labile enterotoxin are potent DNA adjuvants that evoke mixed Th1/Th17  
687 cellular immune responses. *Hum Vaccin Immunother.* 2015;11(9):2228-40. Epub 2015/06/05. doi:  
688 10.1080/21645515.2015.1026498. PubMed PMID: 26042527; PubMed Central PMCID:  
689 PMCPMC4635876.
- 690 26. Jalah R, Patel V, Kulkarni V, Rosati M, Alicea C, Ganneru B, et al. IL-12 DNA as  
691 molecular vaccine adjuvant increases the cytotoxic T cell responses and breadth of humoral  
692 immune responses in SIV DNA vaccinated macaques. *Hum Vaccin Immunother.*  
693 2012;8(11):1620-9. Epub 2012/08/17. doi: 10.4161/hv.21407. PubMed PMID: 22894956;  
694 PubMed Central PMCID: PMCPMC3601136.
- 695 27. Kalams SA, Parker SD, Elizaga M, Metch B, Edupuganti S, Hural J, et al. Safety and  
696 comparative immunogenicity of an HIV-1 DNA vaccine in combination with plasmid interleukin  
697 12 and impact of intramuscular electroporation for delivery. *J Infect Dis.* 2013;208(5):818-29.

698 Epub 2013/07/11. doi: 10.1093/infdis/jit236. PubMed PMID: 23840043; PubMed Central  
699 PMCID: PMCPMC3733506.

700 28. Villarreal DO, Svoronos N, Wise MC, Shedlock DJ, Morrow MP, Conejo-Garcia JR, et al.  
701 Molecular adjuvant IL-33 enhances the potency of a DNA vaccine in a lethal challenge model.  
702 Vaccine. 2015;33(35):4313-20. Epub 2015/04/19. doi: 10.1016/j.vaccine.2015.03.086. PubMed  
703 PMID: 25887087; PubMed Central PMCID: PMCPMC4546882.

704 29. McLaren JE, Clement M, Marsden M, Miners KL, Llewellyn-Lacey S, Grant EJ, et al. IL-  
705 33 Augments Virus-Specific Memory T Cell Inflation and Potentiates the Efficacy of an  
706 Attenuated Cytomegalovirus-Based Vaccine. J Immunol. 2019;202(3):943-55. Epub 2019/01/13.  
707 doi: 10.4049/jimmunol.1701757. PubMed PMID: 30635396; PubMed Central PMCID:  
708 PMCPMC6341181.

709 30. Bonilla WV, Frohlich A, Senn K, Kallert S, Fernandez M, Johnson S, et al. The alarmin  
710 interleukin-33 drives protective antiviral CD8(+) T cell responses. Science. 2012;335(6071):984-  
711 9. Epub 2012/02/11. doi: 10.1126/science.1215418. PubMed PMID: 22323740.

712 31. Yang Q, Li G, Zhu Y, Liu L, Chen E, Turnquist H, et al. IL-33 synergizes with TCR and  
713 IL-12 signaling to promote the effector function of CD8+ T cells. Eur J Immunol.  
714 2011;41(11):3351-60. Epub 2011/09/03. doi: 10.1002/eji.201141629. PubMed PMID: 21887788;  
715 PubMed Central PMCID: PMCPMC3332117.

716 32. Cassani B, Villablanca EJ, De Calisto J, Wang S, Mora JR. Vitamin A and immune  
717 regulation: role of retinoic acid in gut-associated dendritic cell education, immune protection and  
718 tolerance. Mol Aspects Med. 2012;33(1):63-76. Epub 2011/11/29. doi:  
719 10.1016/j.mam.2011.11.001. PubMed PMID: 22120429; PubMed Central PMCID:  
720 PMCPMC3246074.

- 721 33. Holechek SA, McAfee MS, Nieves LM, Guzman VP, Manhas K, Fouts T, et al.  
722 Retinaldehyde dehydrogenase 2 as a molecular adjuvant for enhancement of mucosal immunity  
723 during DNA vaccination. *Vaccine*. 2016;34(46):5629-35. Epub 2016/10/25. doi:  
724 10.1016/j.vaccine.2016.09.013. PubMed PMID: 27670072; PubMed Central PMCID:  
725 PMCPMC5080981.
- 726 34. Velu V, Titanji K, Zhu B, Husain S, Pladevega A, Lai L, et al. Enhancing SIV-specific  
727 immunity in vivo by PD-1 blockade. *Nature*. 2009;458(7235):206-10. Epub 2008/12/17. doi:  
728 10.1038/nature07662. PubMed PMID: 19078956; PubMed Central PMCID: PMCPMC2753387.
- 729 35. Hryniewicz A, Boasso A, Edghill-Smith Y, Vaccari M, Fuchs D, Venzon D, et al. CTLA-  
730 4 blockade decreases TGF-beta, IDO, and viral RNA expression in tissues of SIVmac251-infected  
731 macaques. *Blood*. 2006;108(12):3834-42. Epub 2006/08/10. doi: 10.1182/blood-2006-04-010637.  
732 PubMed PMID: 16896154; PubMed Central PMCID: PMCPMC1895471.
- 733 36. Amedee AM, Lacour N, Gierman JL, Martin LN, Clements JE, Bohm R, Jr., et al.  
734 Genotypic selection of simian immunodeficiency virus in macaque infants infected  
735 transplacentally. *J Virol*. 1995;69(12):7982-90. Epub 1995/12/01. doi: 10.1128/JVI.69.12.7982-  
736 7990.1995. PubMed PMID: 7494311; PubMed Central PMCID: PMCPMC189743.
- 737 37. Fuller DH, Rajakumar PA, Wilson LA, Trichel AM, Fuller JT, Shipley T, et al. Induction  
738 of mucosal protection against primary, heterologous simian immunodeficiency virus by a DNA  
739 vaccine. *J Virol*. 2002;76(7):3309-17. Epub 2002/03/09. doi: 10.1128/jvi.76.7.3309-3317.2002.  
740 PubMed PMID: 11884556; PubMed Central PMCID: PMCPMC136011.
- 741 38. Fuller DH, Rajakumar PA, Wu MS, McMahon CW, Shipley T, Fuller JT, et al. DNA  
742 immunization in combination with effective antiretroviral drug therapy controls viral rebound and

- 743 prevents simian AIDS after treatment is discontinued. *Virology*. 2006;348(1):200-15. Epub  
744 2006/01/28. doi: 10.1016/j.virol.2005.12.008. PubMed PMID: 16439000.
- 745 39. Dross SE, Munson PV, Kim SE, Bratt DL, Tunggal HC, Gervassi AL, et al. Kinetics of  
746 Myeloid-Derived Suppressor Cell Frequency and Function during Simian Immunodeficiency  
747 Virus Infection, Combination Antiretroviral Therapy, and Treatment Interruption. *J Immunol*.  
748 2017;198(2):757-66. Epub 2016/12/16. doi: 10.4049/jimmunol.1600759. PubMed PMID:  
749 27974456; PubMed Central PMCID: PMC5225043.
- 750 40. O'Connor MA, Munson PV, Tunggal HC, Hajari N, Lewis TB, Bratt D, et al. Mucosal T  
751 Helper 17 and T Regulatory Cell Homeostasis Correlate with Acute Simian Immunodeficiency  
752 Virus Viremia and Responsiveness to Antiretroviral Therapy in Macaques. *AIDS Res Hum*  
753 *Retroviruses*. 2019;35(3):295-305. Epub 2018/11/07. doi: 10.1089/AID.2018.0184. PubMed  
754 PMID: 30398361; PubMed Central PMCID: PMC6434588.
- 755 41. Peterson CW, Younan P, Polacino PS, Maurice NJ, Miller HW, Prlic M, et al. Robust  
756 suppression of env-SHIV viremia in *Macaca nemestrina* by 3-drug ART is independent of timing  
757 of initiation during chronic infection. *J Med Primatol*. 2013;42(5):237-46. Epub 2013/09/13. doi:  
758 10.1111/jmp.12060. PubMed PMID: 24025078; PubMed Central PMCID: PMC3772551.
- 759 42. Baum LL, Cassutt KJ, Knigge K, Khattri R, Margolick J, Rinaldo C, et al. HIV-1 gp120-  
760 specific antibody-dependent cell-mediated cytotoxicity correlates with rate of disease progression.  
761 *J Immunol*. 1996;157(5):2168-73. Epub 1996/09/01. PubMed PMID: 8757343.
- 762 43. Lambotte O, Ferrari G, Moog C, Yates NL, Liao HX, Parks RJ, et al. Heterogeneous  
763 neutralizing antibody and antibody-dependent cell cytotoxicity responses in HIV-1 elite  
764 controllers. *AIDS*. 2009;23(8):897-906. Epub 2009/05/06. doi: 10.1097/QAD.0b013e328329f97d.  
765 PubMed PMID: 19414990; PubMed Central PMCID: PMC3652655.

- 766 44. Mandelboim O, Malik P, Davis DM, Jo CH, Boyson JE, Strominger JL. Human CD16 as  
767 a lysis receptor mediating direct natural killer cell cytotoxicity. *P Natl Acad Sci USA*.  
768 1999;96(10):5640-4. doi: DOI 10.1073/pnas.96.10.5640. PubMed PMID:  
769 WOS:000080246500059.
- 770 45. Cecchinato V, Trindade CJ, Laurence A, Heraud JM, Brenchley JM, Ferrari MG, et al.  
771 Altered balance between Th17 and Th1 cells at mucosal sites predicts AIDS progression in simian  
772 immunodeficiency virus-infected macaques. *Mucosal Immunol*. 2008;1(4):279-88. doi:  
773 10.1038/mi.2008.14. PubMed PMID: WOS:000260470900005.
- 774 46. Pallikkuth S, Micci L, Ende ZS, Iriete RI, Cervasi B, Lawson B, et al. Maintenance of  
775 intestinal Th17 cells and reduced microbial translocation in SIV-infected rhesus macaques treated  
776 with interleukin (IL)-21. *PLoS Pathog*. 2013;9(7):e1003471. Epub 2013/07/16. doi:  
777 10.1371/journal.ppat.1003471. PubMed PMID: 23853592; PubMed Central PMCID:  
778 PMC3701718.
- 779 47. Kanwar B, Favre D, McCune JM. Th17 and regulatory T cells: implications for AIDS  
780 pathogenesis. *Curr Opin HIV AIDS*. 2010;5(2):151-7. Epub 2010/06/15. doi:  
781 10.1097/COH.0b013e328335c0c1. PubMed PMID: 20543593; PubMed Central PMCID:  
782 PMC2999911.
- 783 48. Chevalier MF, Weiss L. The split personality of regulatory T cells in HIV infection. *Blood*.  
784 2013;121(1):29-37. Epub 2012/10/09. doi: 10.1182/blood-2012-07-409755. PubMed PMID:  
785 23043072.
- 786 49. Winstone N, Wilson AJ, Morrow G, Boggiano C, Chiuchiolo MJ, Lopez M, et al. Enhanced  
787 control of pathogenic Simian immunodeficiency virus SIVmac239 replication in macaques  
788 immunized with an interleukin-12 plasmid and a DNA prime-viral vector boost vaccine regimen.

789 J Virol. 2011;85(18):9578-87. Epub 2011/07/08. doi: 10.1128/JVI.05060-11. PubMed PMID:  
790 21734035; PubMed Central PMCID: PMCPMC3165762.

791 50. Sui Y, Zhu Q, Gagnon S, Dzutsev A, Terabe M, Vaccari M, et al. Innate and adaptive  
792 immune correlates of vaccine and adjuvant-induced control of mucosal transmission of SIV in  
793 macaques. Proc Natl Acad Sci U S A. 2010;107(21):9843-8. Epub 2010/05/12. doi:  
794 10.1073/pnas.0911932107. PubMed PMID: 20457926; PubMed Central PMCID:  
795 PMCPMC2906837.

796 51. Flingai S, Czerwonko M, Goodman J, Kudchodkar SB, Muthumani K, Weiner DB.  
797 Synthetic DNA vaccines: improved vaccine potency by electroporation and co-delivered genetic  
798 adjuvants. Front Immunol. 2013;4:354. Epub 2013/11/10. doi: 10.3389/fimmu.2013.00354.  
799 PubMed PMID: 24204366; PubMed Central PMCID: PMCPMC3816528.

800 52. Wang S, Zhang C, Zhang L, Li J, Huang Z, Lu S. The relative immunogenicity of DNA  
801 vaccines delivered by the intramuscular needle injection, electroporation and gene gun methods.  
802 Vaccine. 2008;26(17):2100-10. Epub 2008/04/02. doi: 10.1016/j.vaccine.2008.02.033. PubMed  
803 PMID: 18378365; PubMed Central PMCID: PMCPMC2790191.

804 53. Yant LJ, Friedrich TC, Johnson RC, May GE, Maness NJ, Enz AM, et al. The high-  
805 frequency major histocompatibility complex class I allele Mamu-B\*17 is associated with control  
806 of simian immunodeficiency virus SIVmac239 replication. J Virol. 2006;80(10):5074-7. Epub  
807 2006/04/28. doi: 10.1128/JVI.80.10.5074-5077.2006. PubMed PMID: 16641299; PubMed  
808 Central PMCID: PMCPMC1472056.

809 54. Loffredo JT, Maxwell J, Qi Y, Glidden CE, Borchardt GJ, Soma T, et al. Mamu-B\*08-  
810 positive macaques control simian immunodeficiency virus replication. J Virol. 2007;81(16):8827-

811 32. Epub 2007/06/01. doi: 10.1128/JVI.00895-07. PubMed PMID: 17537848; PubMed Central  
812 PMCID: PMC1951344.

813 55. Munson P, Liu Y, Bratt D, Fuller JT, Hu X, Pavlakis GN, et al. Therapeutic conserved  
814 elements (CE) DNA vaccine induces strong T-cell responses against highly conserved viral  
815 sequences during simian-human immunodeficiency virus infection. *Hum Vaccin Immunother.*  
816 2018;14(7):1820-31. Epub 2018/04/13. doi: 10.1080/21645515.2018.1448328. PubMed PMID:  
817 29648490; PubMed Central PMCID: PMC6067903.

818

819

820 **Fig 1. Therapeutic Vaccine Study Design & Response to Antiretroviral Therapy.**

821 Indian origin rhesus macaques were infected with SIV $\Delta$ B670 at week 0 (red arrow) and were  
822 treated with ART starting at 6 weeks post-infection (wpi). Purple arrows indicate a series of 5  
823 DNA immunizations spaced 1 month apart, occurring between 32 wpi and 48 wpi. At week 55,  
824 ART was interrupted to assess the efficacy of the therapeutic vaccine on viral control. Animals  
825 were necropsied at 80 wpi or earlier in the presence of AIDS-defining conditions. Red triangles  
826 indicate blood draws for PBMC isolation and brown circles indicate MLN biopsies to measure  
827 systemic and gut-associated immune responses. Prior to administering therapeutic immunizations,  
828 macaques were stratified so that each group had comparable viral loads and CD4 counts prior to  
829 and during ART.

830 **Fig 2. DNA vaccine and adjuvant combinations increase Env-specific antibody responses**  
831 **during ART.**

832 **(A)** The magnitude of the SIV Env-specific IgG response in the plasma was measured by ELISA,  
833 using SIV gp130 as the capture antigen. Shown are medians and interquartile ranges. **(B)** Peak SIV  
834 Env-specific antibody titers are shown for the MAG + LT group (34 wpi) and for the MAG + AC  
835 group (38 wpi). Shown are medians and interquartile ranges with individual responses layered over  
836 each bar. **(C)** SIV gp130-specific IgG that bind to Fc $\gamma$ R3a, as a surrogate marker for ADCC, was  
837 measured using a modified ELISA that employed Fc $\gamma$ R3a conjugated to Streptavidin poly-HRP  
838 for the detection antibody. Shown are medians and interquartile ranges with individual responses  
839 layered over each bar. **(B, C) Statistics.** A Dunn's multiple comparisons test was used when  
840 making multiple comparisons between vaccine groups and the mock group. Results are considered  
841 significant if  $P \leq 0.05$ .



842 **Fig 3. DNA vaccine and adjuvant combinations increase SIV-specific IFN- $\gamma$  T cell responses**  
843 **during ART.**

844 **(A-B)** PBMCs were stimulated with Gag, Env, Pol, Vif, Vpr, Rev, Nef, and Tat peptides to  
845 quantify the SIV-specific IFN- $\gamma$  response. Samples were considered positive if peptide-specific  
846 responses were at least twice that of the negative control plus at least 0.01% after background  
847 (DMSO) subtraction. **(A)** Shown are medians and interquartile ranges of the cumulative (sum of  
848 response against all peptides) IFN- $\gamma$  response. **(B)** The cumulative SIV-specific IFN- $\gamma$  response is  
849 shown after 3 vaccinations (42 wpi) and post-vaccination (50 wpi). Shown are medians and  
850 interquartile ranges with individual responses layered over each bar. **(C-D)** The breadth of the  
851 SIV-specific IFN- $\gamma$  response is the number of peptide pools with a positive IFN- $\gamma$  response. **(C)**  
852 Shown are the medians and individual responses layered over each timepoint. **(D)** The cumulative  
853 breadth of the the SIV-specific IFN- $\gamma$  response post-vaccination (50 wpi) is shown. Depicted are  
854 medians and interquartile ranges with individual responses layered over each bar. **(E)** The percent  
855 of the IFN- $\gamma$  response specific for Gag, Env and accessory proteins was calculated from the  
856 cumulative IFN- $\gamma$  response at peak breadth (34 wpi for MAG + LT, 42 wpi for MAG + AC and  
857 Mock.) **(B, D) Statistics.** A Dunn's multiple comparisons test was used when making multiple  
858 comparisons between vaccine groups and the mock group. Results are considered significant if  $P$   
859  $\leq 0.05$ .

860 **Fig 4. The MAG + AC group shows a trend towards increased IFN- $\gamma$  and TNF $\alpha$  CD8<sup>+</sup> T cell**  
861 **responses post-vaccination compared to pre-vaccination.**

862 **(A)** PBMCs were thawed and stimulated with Gag peptides, and expression of IL-2, IFN- $\gamma$ , TNF $\alpha$   
863 and CD107a/GzB were quantified using intracellular cytokine staining. Shown are the medians  
864 and interquartile ranges of each group's SIV-Gag specific T cell response. **(B)** Lymphocytes

865 isolated from MLN were thawed and stimulated with Gag peptides, and expression of IL-2, IFN-  
866  $\gamma$ , TNF $\alpha$  and CD107a/GzB were quantified using intracellular cytokine staining. Shown are the  
867 medians and interquartile ranges of each group's SIV-Gag specific T cell response. **(A, B)**  
868 **Statistics.** Statistical comparisons between baseline and post-vaccination timepoints within a  
869 group were calculated using a Wilcoxon matched-pairs signed rank test. Results are considered  
870 significant if  $P \leq 0.05$ .

871 **Fig 5. Three out of five animals in the MAG + AC group control virus replication during**  
872 **ATI.**

873 **(A-C)** Plasma viral RNA levels were quantified using RT-q-PCR, with a limit of detection of 30  
874 viral RNA copies per 1 mL of plasma, as indicated by the dashed line. **(D)** Shown are the median  
875 viral load and interquartile ranges for each treatment group. The dotted line indicates the threshold  
876 for control of virus replication, based on previous studies using SIV $\Delta$ B670.

877 **Fig 6. Five controllers maintained significantly lower viral burden during ATI compared to**  
878 **nine noncontrollers.**

879 **(A)** Plasma viral RNA levels were quantified using RT-q-PCR, with a limit of detection of 30 viral  
880 RNA copies per 1 mL of plasma, as indicated by the dashed line. The dotted line denotes the  
881 threshold for control of virus replication, based on previous studies using SIV $\Delta$ B670. Controllers  
882 were defined as animals that maintained a median viremia at or below 1000 viral RNA copies per  
883 1 mL of plasma for 5 months post-ART. Noncontrollers were defined as animals with a median  
884 viremia that exceeded 1000 viral RNA copies per 1mL of plasma for 5 months post-ART. **(B)**  
885 Viral burden during ATI was calculated as the area under the curve of each animal's viral load  
886 from 55 wpi to 76 wpi, shown are the median viral burden and interquartile ranges. Statistics were  
887 calculated using a Mann-Whitney t test. Results are considered significant if  $P \leq 0.05$ .

888 **Fig 7. Controllers have higher SIV Gag-specific CD8<sup>+</sup> T cell responses in PBMC and MLN**  
889 **post-vaccination and during ATI.**

890 **(A-C)** PBMCs and MLNs were thawed and stimulated with Gag peptides, and expression of  
891 cytokines was quantified using intracellular cytokine staining. Shown are the medians and  
892 interquartile ranges of the SIV Gag-specific CD8<sup>+</sup> T cell responses of controllers and  
893 noncontrollers, with individual responses layered over each bar at a post-vaccination timepoint (50  
894 wpi) and during ATI (62 wpi for PBMC and 66 wpi for MLN). Statistical differences between  
895 controllers and noncontrollers at each timepoint were calculated using a Mann Whitney t test.  
896 Benjamini-Hochberg adjusted P values are shown, results are considered significant if  $P \leq 0.05$ .  
897 **(D)** The SIV Gag-specific TNF $\alpha$  CD8<sup>+</sup> T cell responses in PBMC at 50 wpi negatively correlated  
898 with the viral burden measured as area under the curve (AUC) during ATI. **(E)** The SIV Gag-  
899 specific IFN- $\gamma$  CD8<sup>+</sup> T cell responses in PBMC at 50 wpi negatively correlated with the viral  
900 burden measured as area under the curve (AUC) during ATI. **(F)** The SIV Gag-specific IL-2 CD8<sup>+</sup>  
901 T cell responses in MLN at 62 wpi negatively correlated with the viral burden measured as area  
902 under the curve (AUC) during ATI. The P and r values shown were calculated using a Spearman  
903 rank correlation test. Benjamini-Hochberg adjusted P values are shown, results are considered  
904 significant if  $P \leq 0.05$ .

905 **Fig 8. Controllers demonstrate increased frequencies of polyfunctional CD8<sup>+</sup> T cells in MLN**  
906 **and PBMC.**

907 **(A-B)** For each animal, the frequencies of SIV-specific CD8<sup>+</sup> T cells expressing any 3  
908 combinations of effector functions were summed up. Shown are the medians and interquartile  
909 ranges of polyfunctional SIV-specific CD8<sup>+</sup> T cells, with individual values layered over each bar.  
910 Statistical differences between controllers and noncontrollers at each timepoint were determined

911 using a Mann Whitney t test. Benjamini-Hochberg adjusted P values are shown. Results are  
912 considered significant if  $P \leq 0.05$ . **(C-D)** The polyfunctional SIV-specific CD8<sup>+</sup> T cell responses  
913 post-vaccination and during ATI negatively correlated with ATI viral burden. The P and r values  
914 shown were calculated using a Spearman rank correlation test. Benjamini-Hochberg adjusted P  
915 values are shown, and results are considered significant if  $P \leq 0.05$ .

916 **Fig 9. Lower viral replication during acute infection correlates with improved ART**  
917 **responsiveness that in turn predicts therapeutic outcome.**

918 **(A-C)** Viral loads were measured via RT-q-PCR and viral burden was calculated as the area under  
919 the curve of animals' viral loads. **(A)** Statistics were calculated using a Mann-Whitney t test.  
920 Benjamini-Hochberg adjusted P values are shown. Results are considered significant if  $P \leq 0.05$ .  
921 **(B-C)** Acute log viral burden (0 – 6 wpi) correlated with log viral burden during ART treatment  
922 (6 – 55 wpi). ART log viral burden in turn correlated with log viral burden during ATI (55 wpi –  
923 76 wpi). **(D)** The frequency of CD4<sup>+</sup> T cells in the colon at baseline (0 wpi) correlated with viral  
924 burden during ATI. **(E)** The ratio of Th17 and Treg cells at baseline correlated with viral burden  
925 during ATI. **(B-E)** A Spearman rank correlation test was used to determine P and r values. Shown  
926 are Benjamini-Hochberg adjusted P values, results are considered significant if  $P \leq 0.05$ .

927 **S1 Fig. Animals in each group demonstrate similar plasma viral loads, CD4 T cell counts,**  
928 **and ART responsiveness.**

929 **(A)** Plasma viral loads as determined by RT-q-PCR for the mock (black circles), MAG + LT (red  
930 squares) and MAG + AC (purple triangles) groups, shown are medians and interquartile ranges.  
931 The dashed line indicates the assay limit of detection (30 viral RNA copies/1mL of plasma) and  
932 the dotted line indicates the threshold for control of virus replication. **(B)** Percent of baseline CD4  
933 T cell counts were calculated for the mock, MAG + LT and MAG + AC groups over time by

934 dividing the absolute CD4 count at a timepoint by the absolute CD4 count at 0 wpi and multiplying  
935 by 100. Shown are medians and interquartile ranges. The dotted line indicates 50% of baseline  
936 CD4 T cells. CD4 T cell counts were obtained using a Beckman Coulter® AC\*<sup>T</sup>™ 5diff  
937 hematology analyzer. **(C)** Shown is the decrease of each animals' viral loads between pre-ART (6  
938 wpi) and pre-vaccination (32 wpi). Statistical analyses were performed using a Wilcoxon matched-  
939 pairs signed rank test; results are considered significant if  $P \leq 0.05$ . **(D)** Shown is the restoration  
940 of each animals' percent of baseline CD4 T cell counts between pre-ART (6 wpi) and pre-  
941 vaccination (32 wpi). Statistical analyses were performed using a Wilcoxon matched-pairs signed  
942 rank test; results are considered significant if  $P \leq 0.05$ .

943 **S2 Fig. No differences were observed between groups in Gag-specific CD4<sup>+</sup> T cell responses**  
944 **in PBMC and MLN.**

945 **(A)** PBMCs were thawed and stimulated with Gag peptides, and expression of IL-2, IFN $\gamma$ , TNF $\alpha$   
946 and CD107a/GzB were quantified using intracellular cytokine staining. Shown are the medians  
947 and interquartile ranges of each group's SIV-Gag specific T cell response. **(B)** Lymphocytes  
948 isolated from MLN were thawed and stimulated with Gag peptides, and expression of IL-2, IFN $\gamma$ ,  
949 TNF $\alpha$  and CD107a/GzB were quantified using intracellular cytokine staining. Shown are the  
950 medians and interquartile ranges of each group's SIV-Gag specific T cell response. **(A, B)**  
951 **Statistics.** Statistical comparisons between baseline and post-vaccination timepoints within a  
952 group were calculated using a Wilcoxon matched-pairs signed rank test. A Dunn's multiple  
953 comparisons test was used when making multiple comparisons between vaccine groups and the  
954 mock group. Results are considered significant if  $P \leq 0.05$ .

955 **S3 Fig. No differences were observed among groups in Env-specific CD8<sup>+</sup> or CD4<sup>+</sup> T cell**  
956 **responses in PBMC.**

957 **(A-B)** PBMCs were thawed and stimulated with Env peptides, and expression of IL-2, IFN $\gamma$ , TNF $\alpha$   
958 and CD107a/GzB were quantified using intracellular cytokine staining. Shown are the medians  
959 and interquartile ranges of each group's SIV-Env specific T cell response. **(A, B) Statistics.**  
960 Statistical comparisons between baseline and post-vaccination timepoints within a group were  
961 calculated using a Wilcoxon matched-pairs signed rank test. A Dunn's multiple comparisons test  
962 was used when making multiple comparisons between vaccine groups and the mock group. Results  
963 are considered significant if  $P \leq 0.05$ .

964 **S4 Fig. No differences were observed among groups in Env-specific CD8<sup>+</sup> or CD4<sup>+</sup> T cell**  
965 **responses in MLN.**

966 **(A-B)** Lymphocytes isolated from MLNs were thawed and stimulated with Env peptides, and  
967 expression of IL-2, IFN $\gamma$ , TNF $\alpha$  and CD107a/GzB were quantified using intracellular cytokine  
968 staining. Shown are the medians and interquartile ranges of each group's SIV-Env specific T cell  
969 response. **(A, B) Statistics.** Statistical comparisons between baseline and post-vaccination  
970 timepoints within a group were calculated using a Wilcoxon matched-pairs signed rank test. A  
971 Dunn's multiple comparisons test was used when making multiple comparisons between vaccine  
972 groups and the mock group. Results are considered significant if  $P \leq 0.05$ .

973 **S5 Fig. CD4<sup>+</sup> T cell counts corresponded with virus burden in plasma.**

974 **(A-C)** Shown are the percent of baseline CD4<sup>+</sup> T cell counts for each individual animal in the  
975 mock, MAG + LT and MAG + AC groups over time. Percent of baseline CD4<sup>+</sup> T cell counts were  
976 calculated for the mock, MAG + LT and MAG + AC groups over time by dividing the absolute  
977 CD4<sup>+</sup> count at a timepoint by the absolute CD4<sup>+</sup> count at 0 wpi and multiplying by 100. The dotted  
978 line indicates 50% of baseline CD4<sup>+</sup> T cells. CD4<sup>+</sup> T cell counts were obtained using a Beckman

979 Coulter® AC\*<sup>T</sup>™ 5diff hematology analyzer. **(D)** Graphed are the median and interquartile range  
980 of controllers' and noncontrollers' percent of baseline CD4<sup>+</sup> counts.

981 **S6 Fig. No difference between controllers/noncontrollers in Gag-specific IL-2<sup>+</sup> and**  
982 **CD107a<sup>+</sup>GzB<sup>+</sup> CD8<sup>+</sup> T cells in PBMC or Gag-specific IFN $\gamma$ <sup>+</sup>, TNF $\alpha$ <sup>+</sup>, and CD107a<sup>+</sup>GzB<sup>+</sup>**  
983 **CD8<sup>+</sup> T cells in MLN.**

984 **(A-E)** PBMCs and MLNs were thawed and stimulated with Gag peptides, and expression of  
985 cytokines was quantified using intracellular cytokine staining. Shown are the medians and  
986 interquartile ranges of the SIV Gag-specific CD8<sup>+</sup> T cell responses of controllers and  
987 noncontrollers, with individual responses layered over each bar at a post-vaccination timepoint (50  
988 wpi) and during ATI (62 wpi for PBMC and 66 wpi for MLN). Statistical differences between  
989 controllers and noncontrollers at each timepoint were assessed using a Mann Whitney t test and  
990 the Benjamini-Hochberg method was used to adjust P values. Results are considered significant if  
991  $P \leq 0.05$ .

992 **S7 Fig. Controllers and noncontrollers demonstrate similar levels of SIV Gag-specific CD4<sup>+</sup>**  
993 **T cell responses in the PBMC and MLN post-vaccination and during ATI.**

994 **(A-B)** PBMCs and MLNs were thawed and stimulated with Gag peptides, and expression of  
995 cytokines was quantified using intracellular cytokine staining. Shown are the medians and  
996 interquartile ranges of the SIV Gag-specific CD4<sup>+</sup> T cell responses of controllers and  
997 noncontrollers, with individual responses layered over each bar at a post-vaccination timepoint (50  
998 wpi) and during ATI (62 wpi for PBMC and 66 wpi for MLN). Statistical differences between  
999 controllers and noncontrollers at each timepoint were assessed using a Mann Whitney t test and  
1000 the Benjamini-Hochberg method was used to adjust P values. Results are considered significant if  
1001  $P \leq 0.05$ .

1002 **S8 Fig. Noncontrollers exhibited a trend towards higher titers of Env-specific IgG compared**  
1003 **to controllers.**

1004 The magnitude of the SIV Env-specific IgG response in the plasma was measured by ELISA, using  
1005 SIV gp130 as the capture antigen. Shown are medians and interquartile ranges.

1006 **S9 Fig. Baseline frequencies of Th17 and Treg cells may play a role in determining**  
1007 **therapeutic outcome during ATI.**

1008 **(A-B)** Lymphocytes were isolated from colon biopsies and expression of Th17 and Treg markers  
1009 was quantified using intracellular cytokine staining on fresh cells. A Spearman rank correlation  
1010 test was used to determine P and r values. Shown are the Benjamini-Hochberg adjusted P values,  
1011 results are considered significant if  $P \leq 0.05$ .

1012



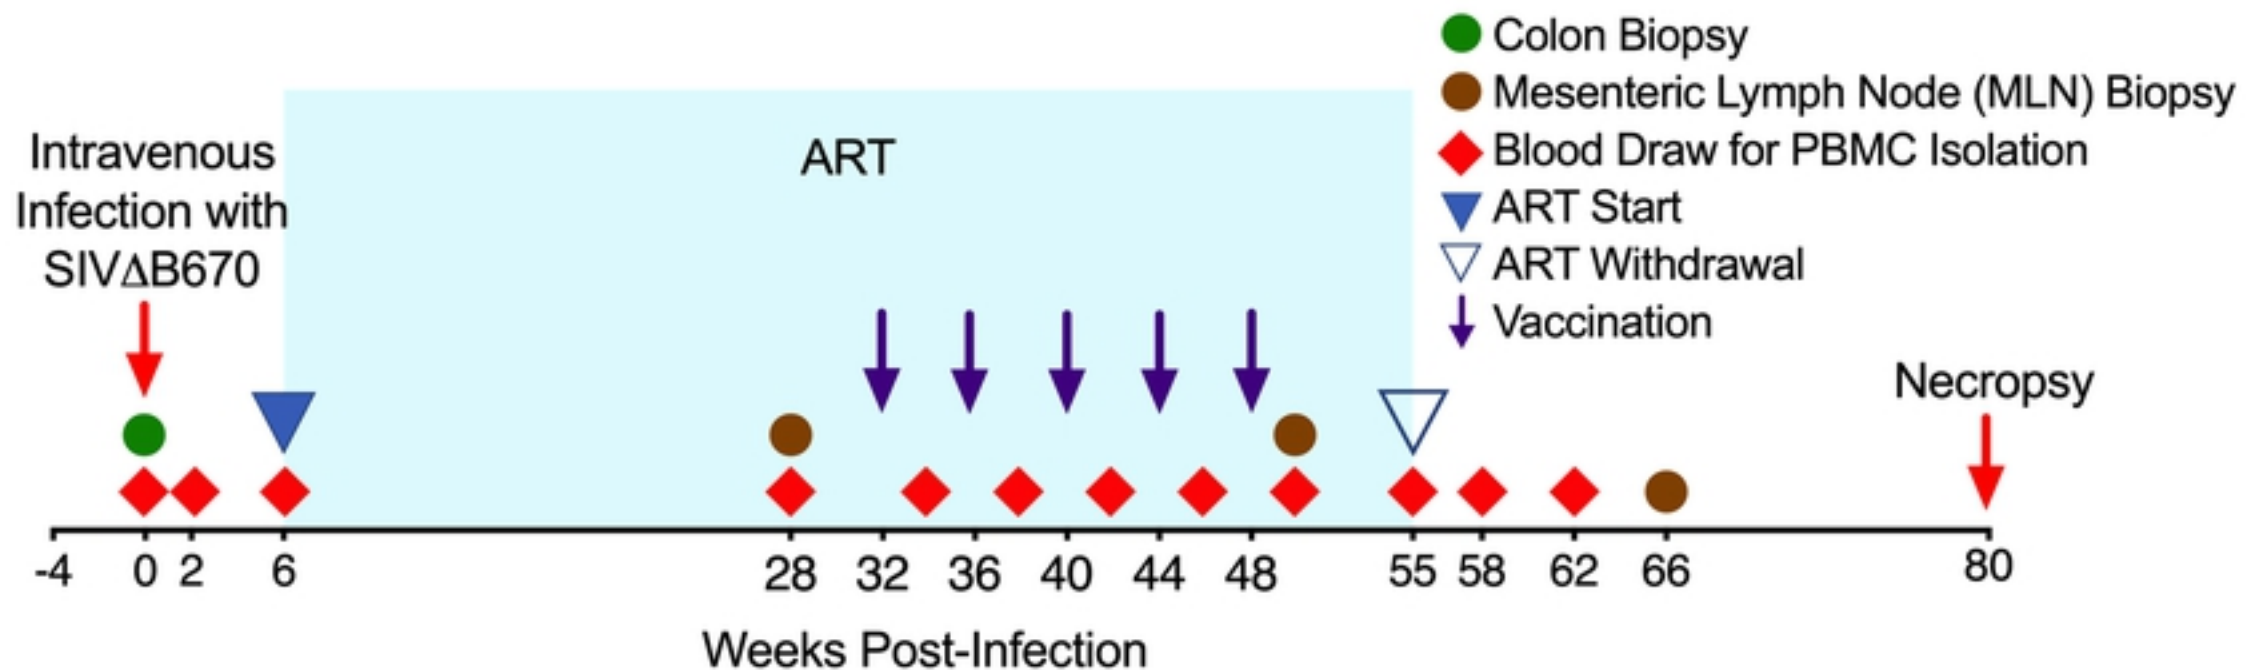

|          | Vaccine                   | Adjuvants                     | Immunomodulators                       | Administration Method       |
|----------|---------------------------|-------------------------------|----------------------------------------|-----------------------------|
| Mock     | Noncoding DNA             | None                          | None                                   | Gene Gun                    |
| MAG + LT | SIV Gag-Pol-Env + p57 Gag | LT                            | None                                   | Gene Gun                    |
| MAG + AC | SIV Gag-Pol-Env + p57 Gag | LTA1 + IL-12 + IL-33 + RALDH2 | sPD-1 + sCD80 (2nd - 5th vaccinations) | Intradermal Electroporation |

Fig 1

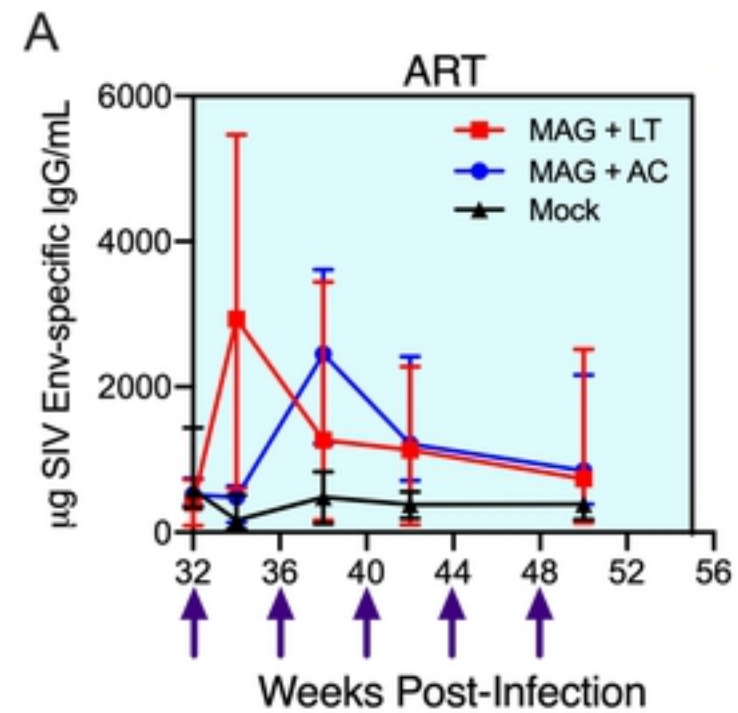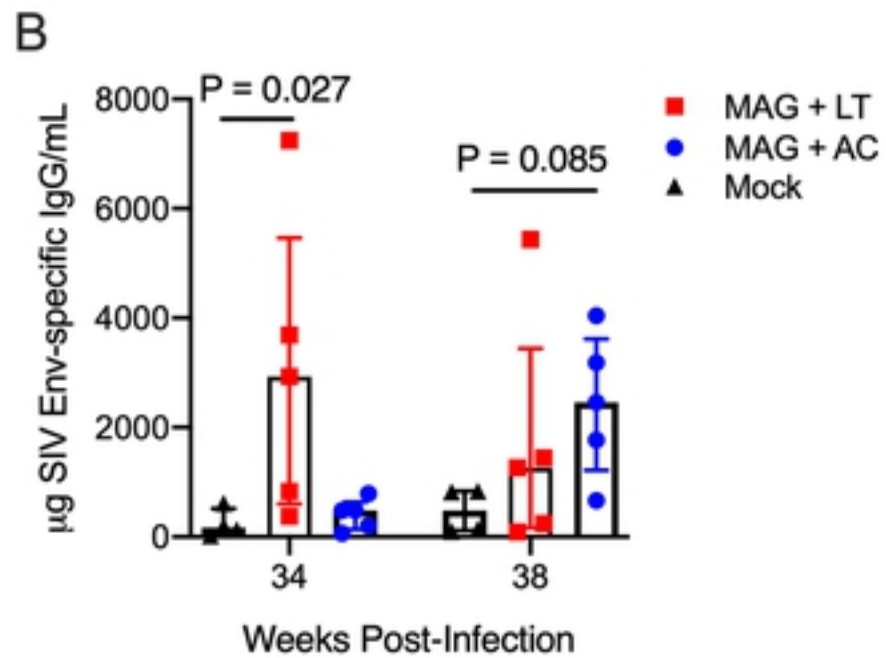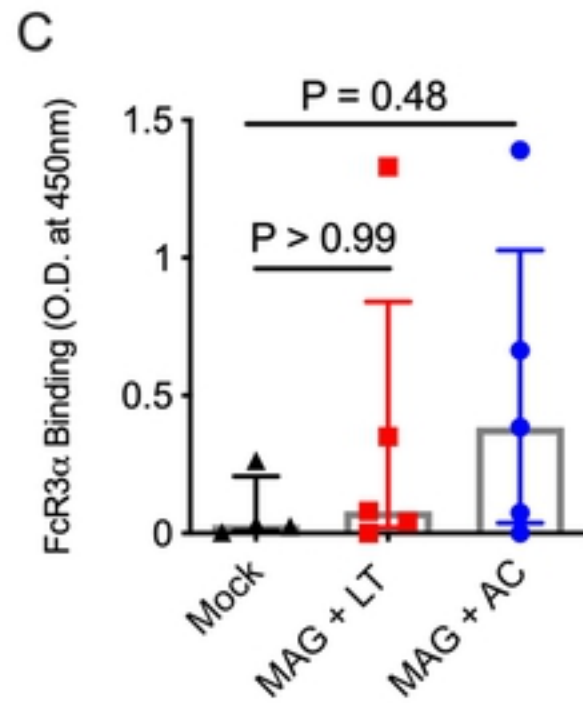

Fig 2

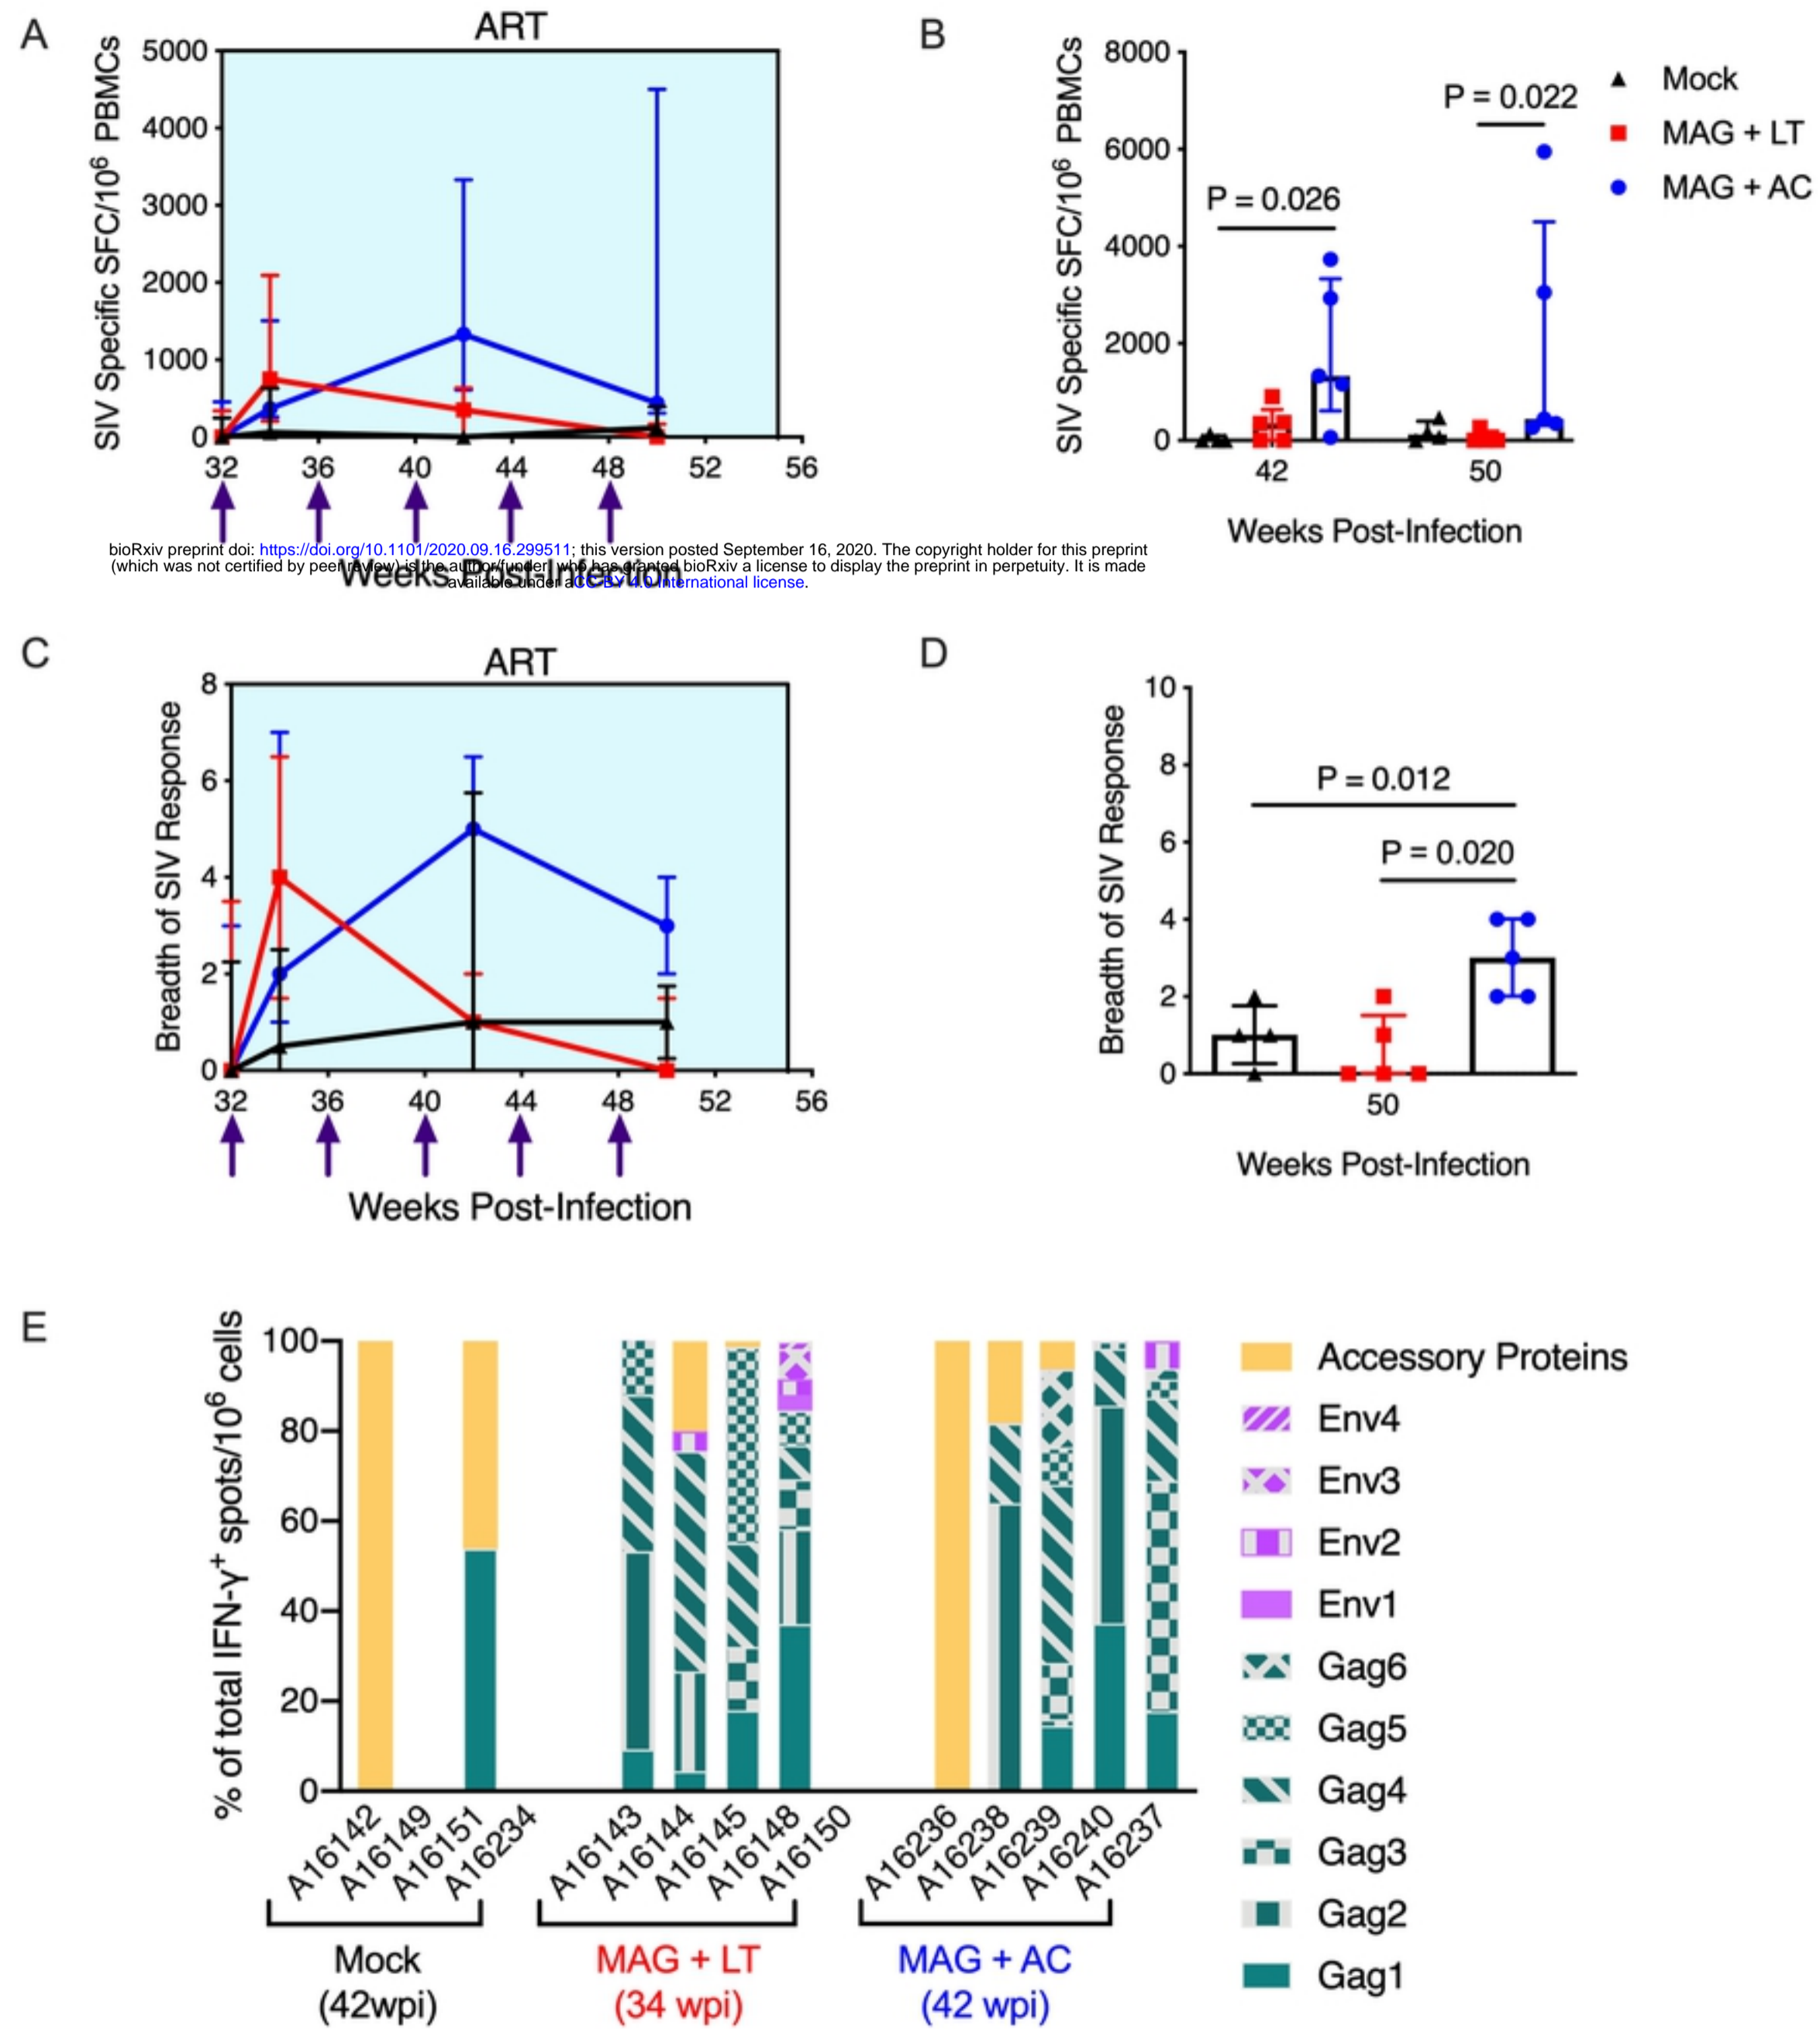

bioRxiv preprint doi: <https://doi.org/10.1101/2020.09.16.299511>; this version posted September 16, 2020. The copyright holder for this preprint (which was not certified by peer review) is the author/funder, who has granted bioRxiv a license to display the preprint in perpetuity. It is made available under aCC-BY 4.0 International license.

Fig 3

PBMC

MLN

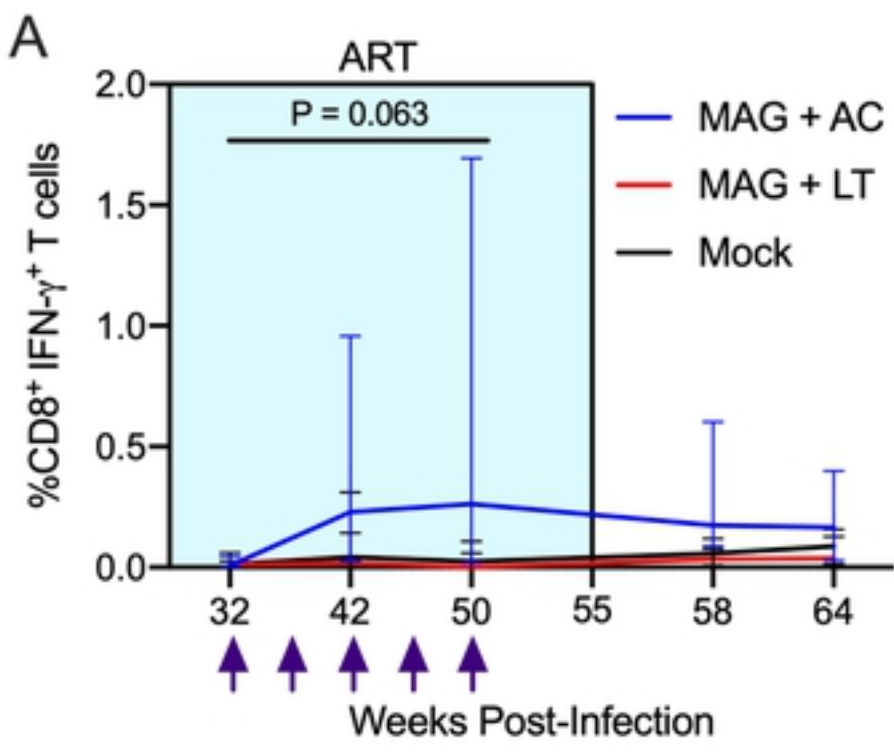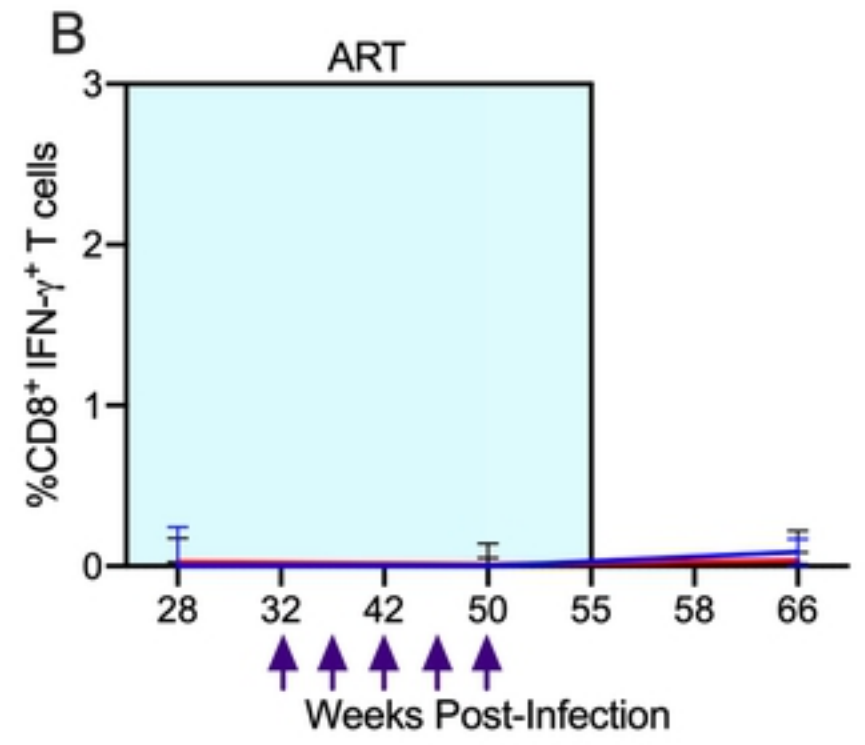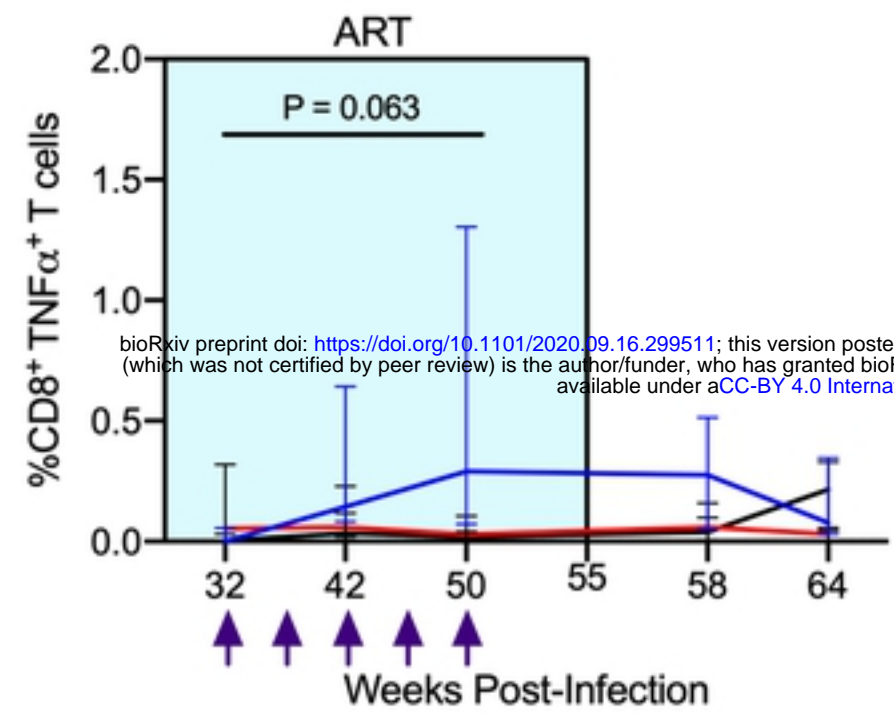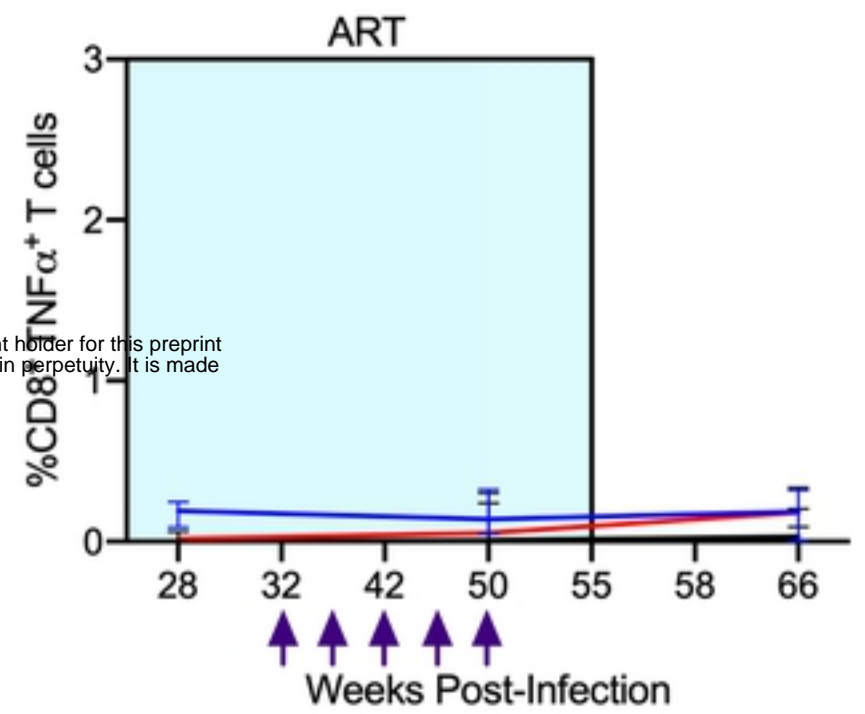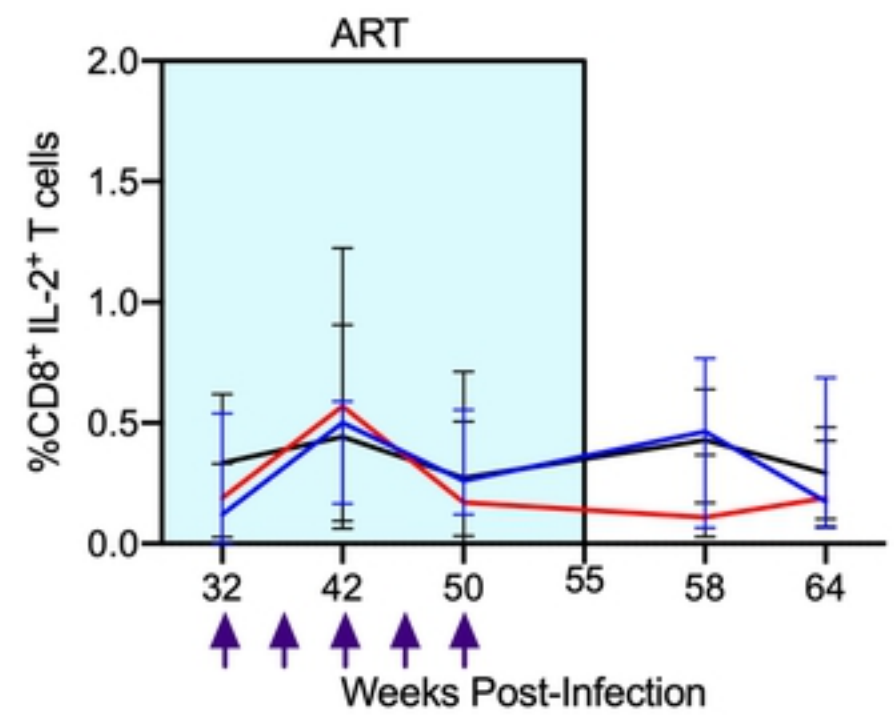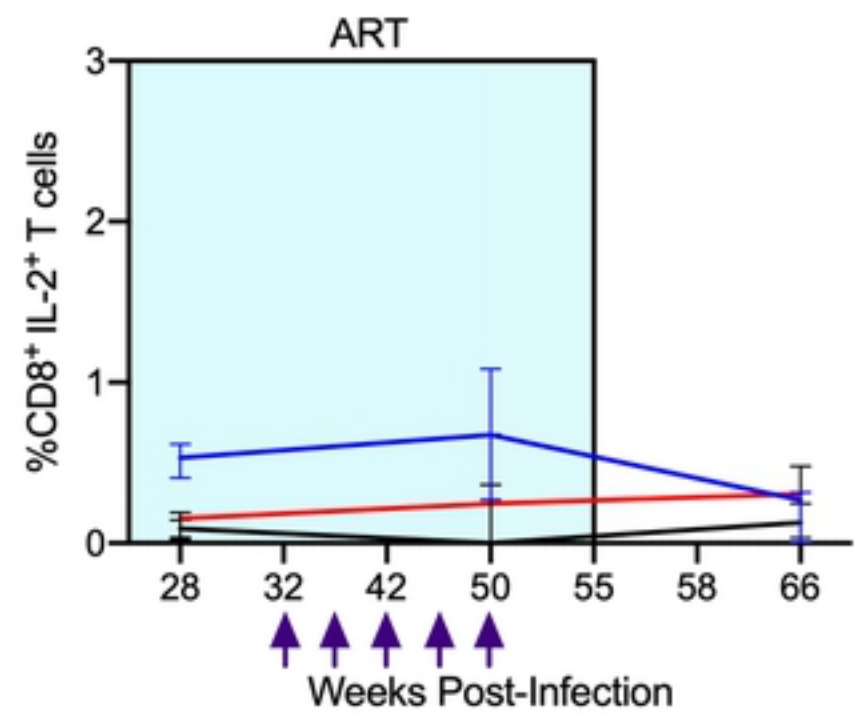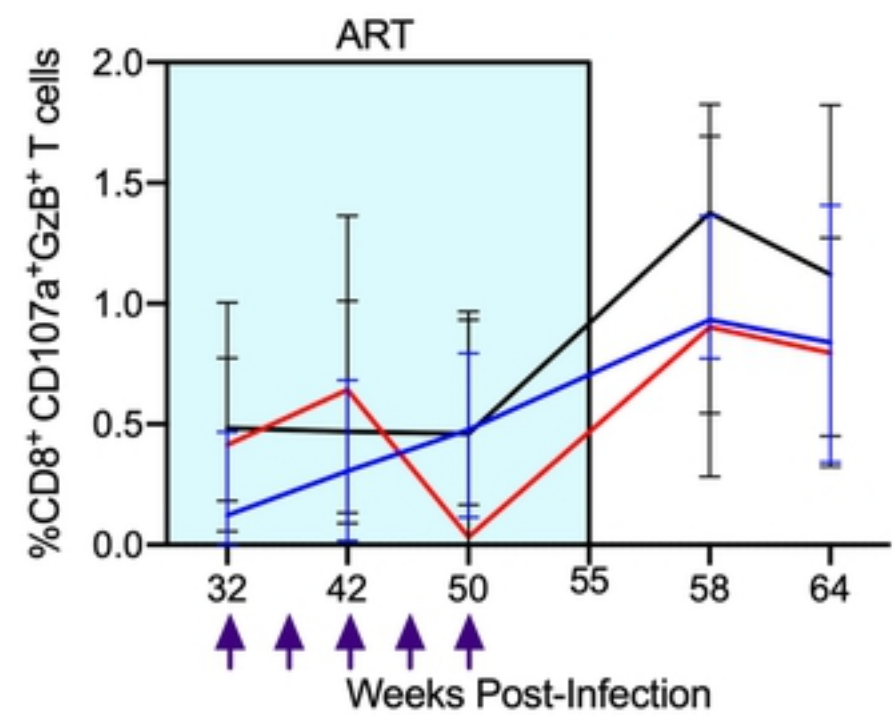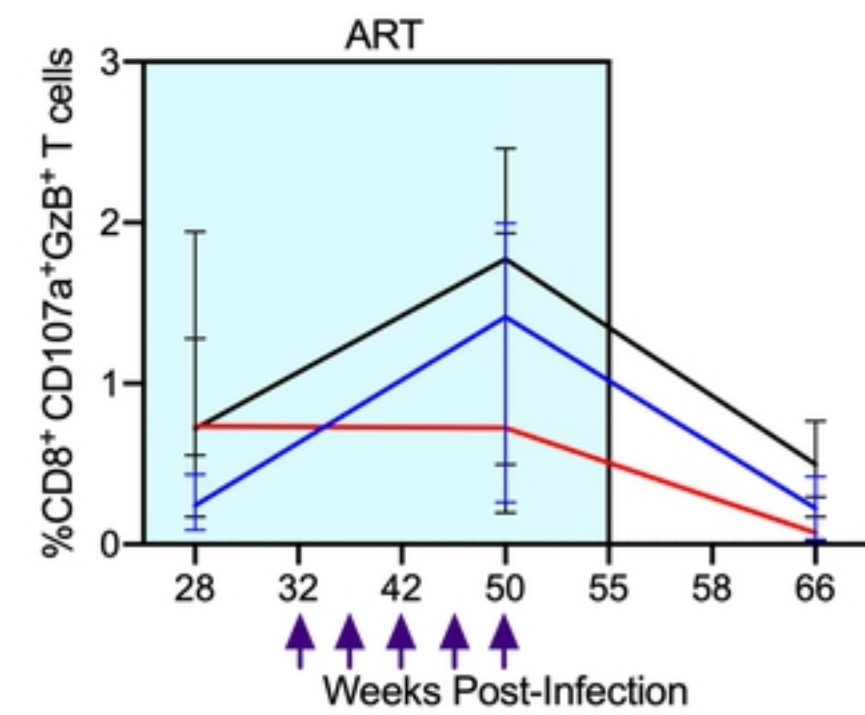

bioRxiv preprint doi: <https://doi.org/10.1101/2020.09.16.299511>; this version posted September 16, 2020. The copyright holder for this preprint (which was not certified by peer review) is the author/funder, who has granted bioRxiv a license to display the preprint in perpetuity. It is made available under aCC-BY 4.0 International license.

Fig 4

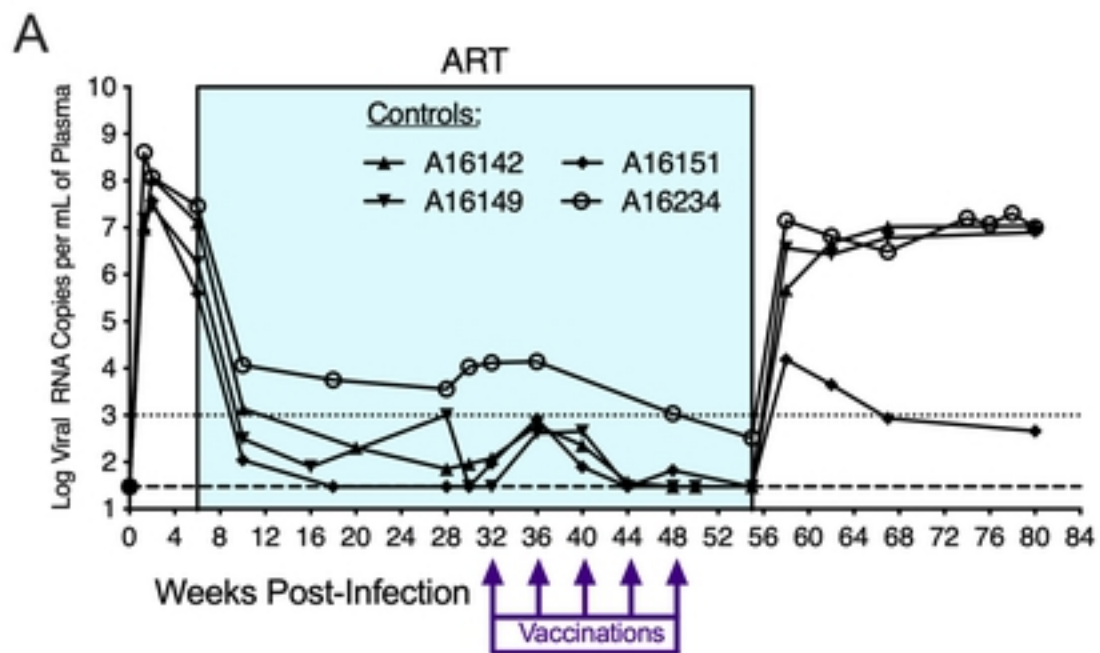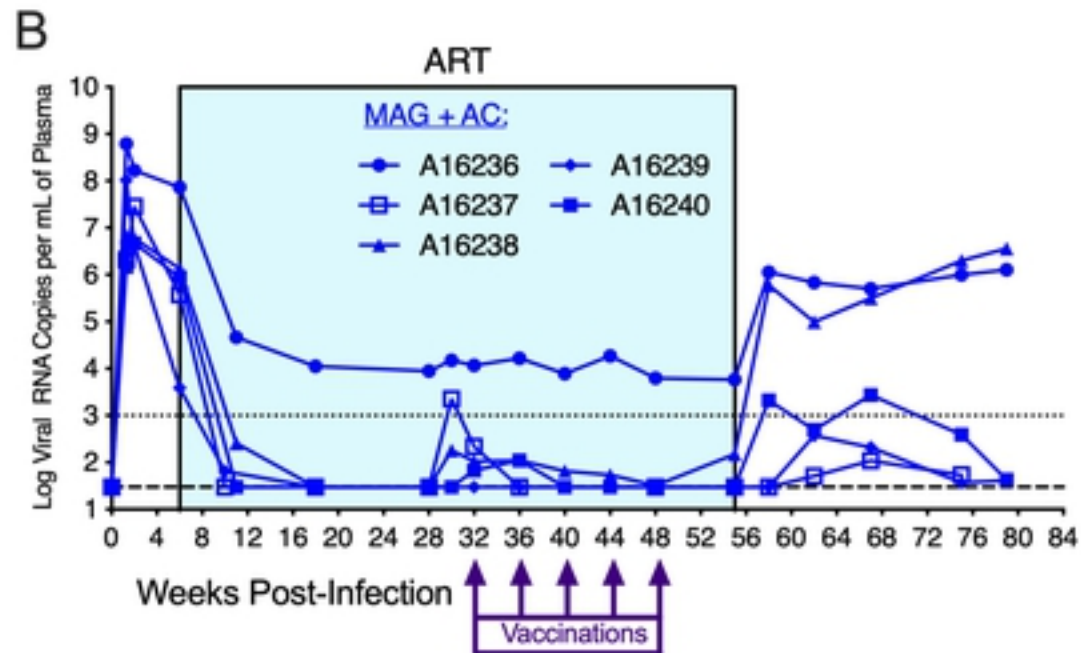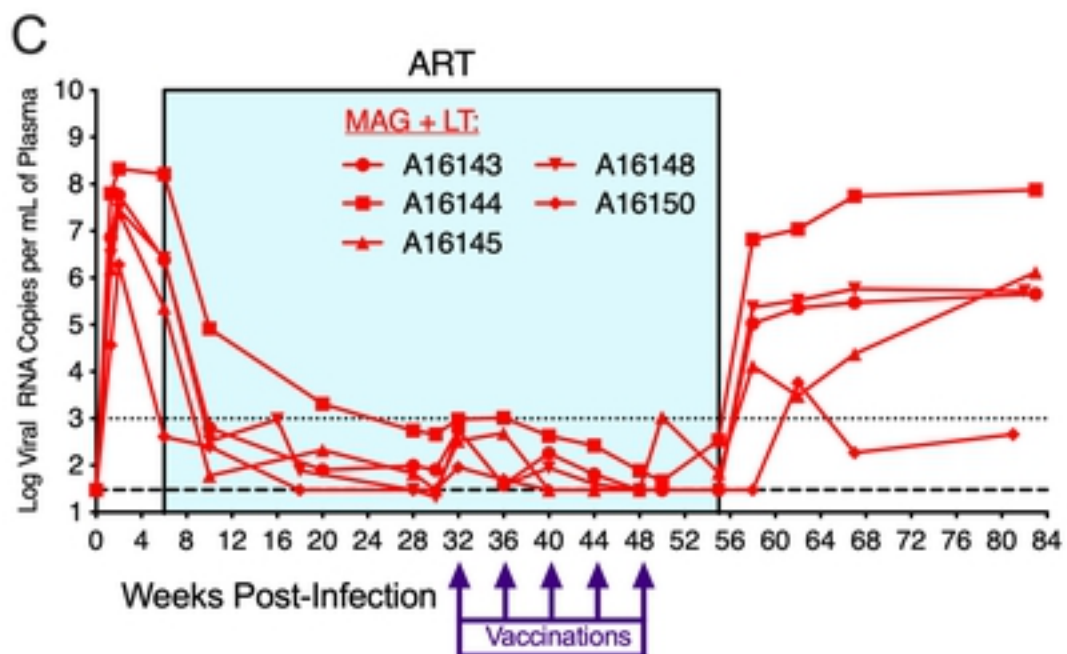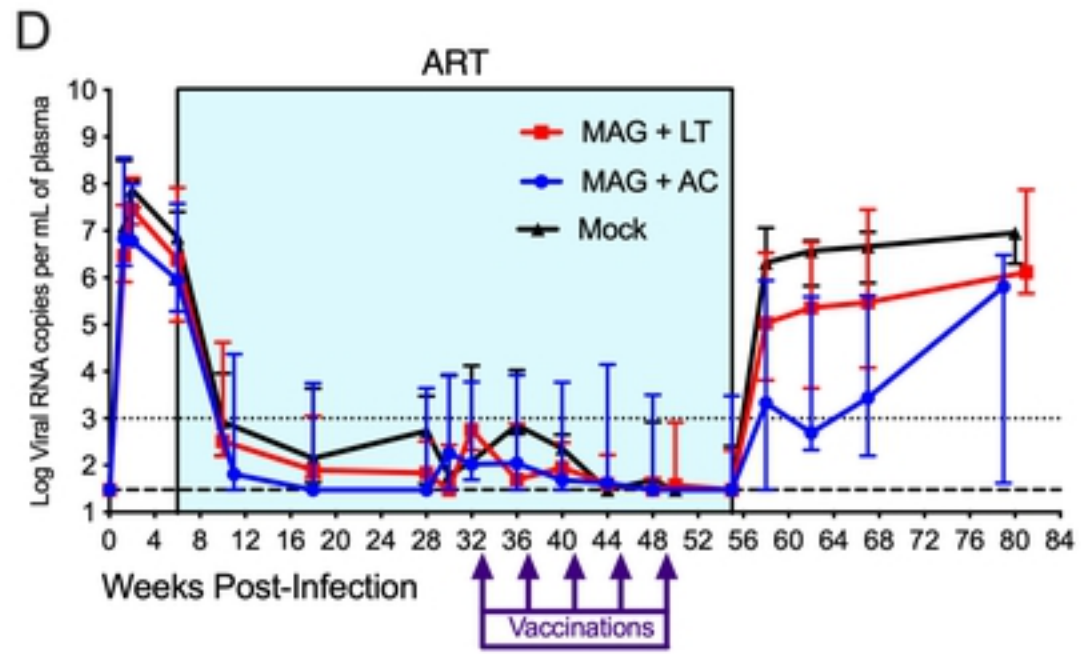

Fig 5

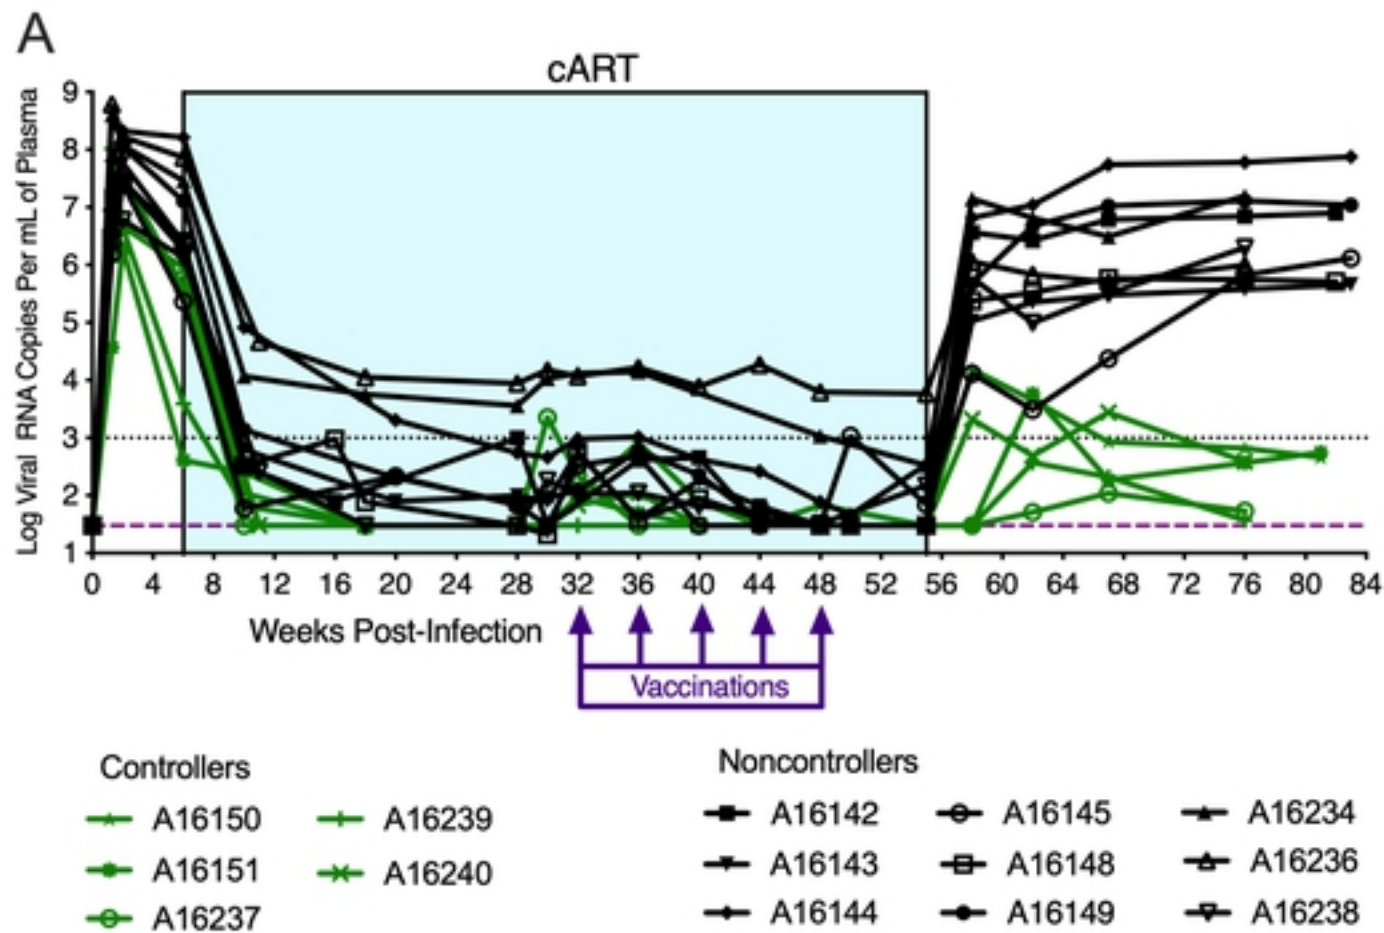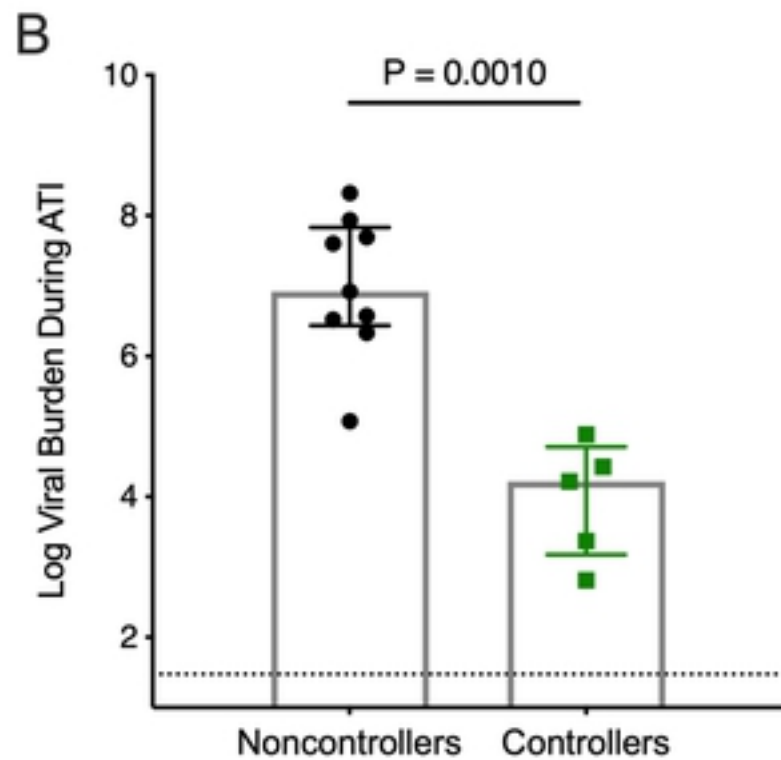

Fig 6

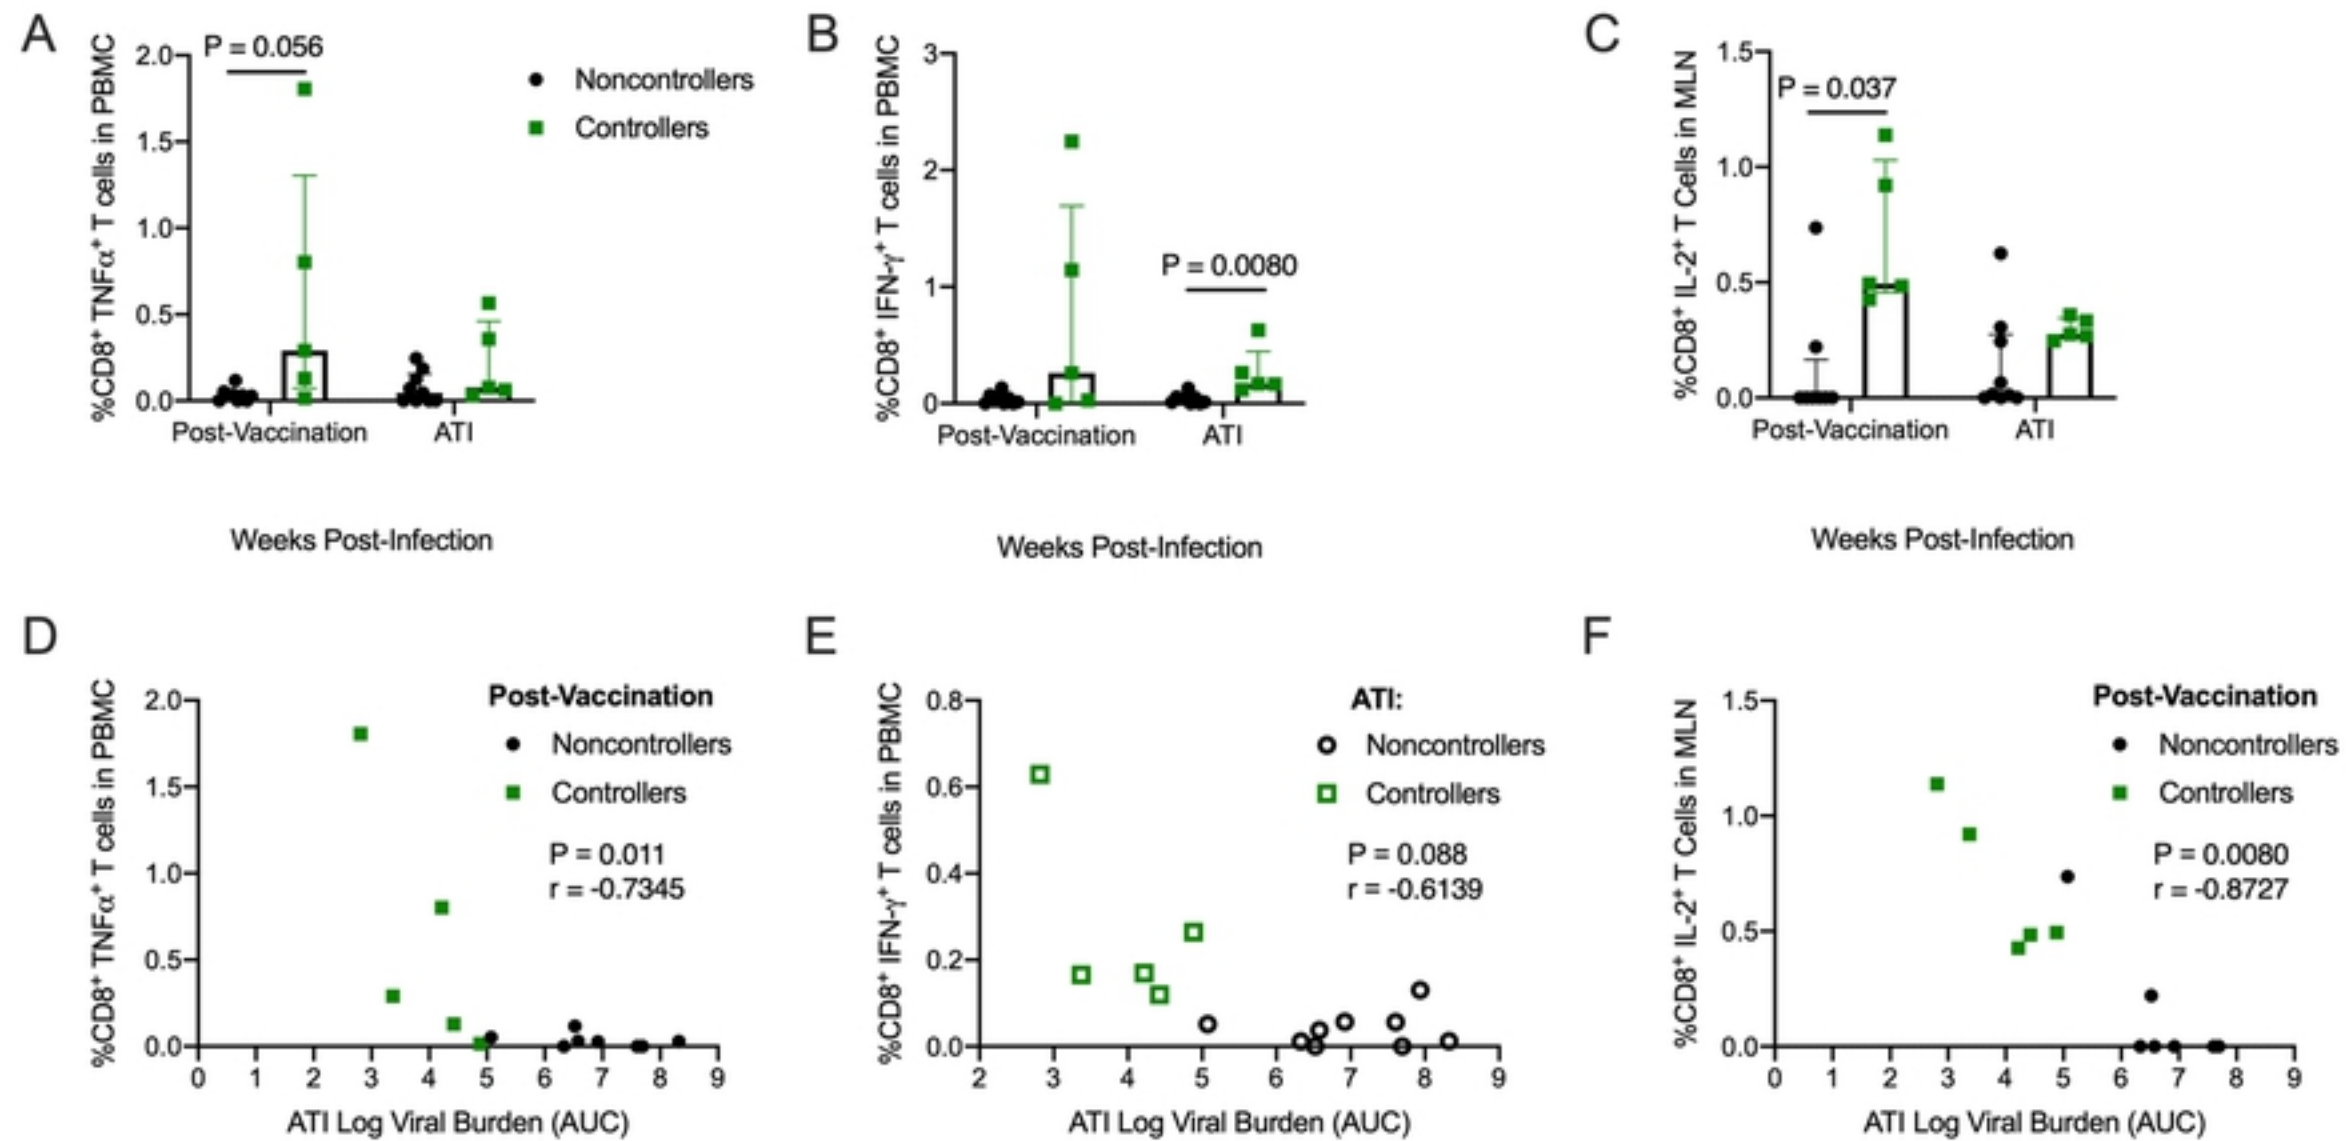

Fig 7

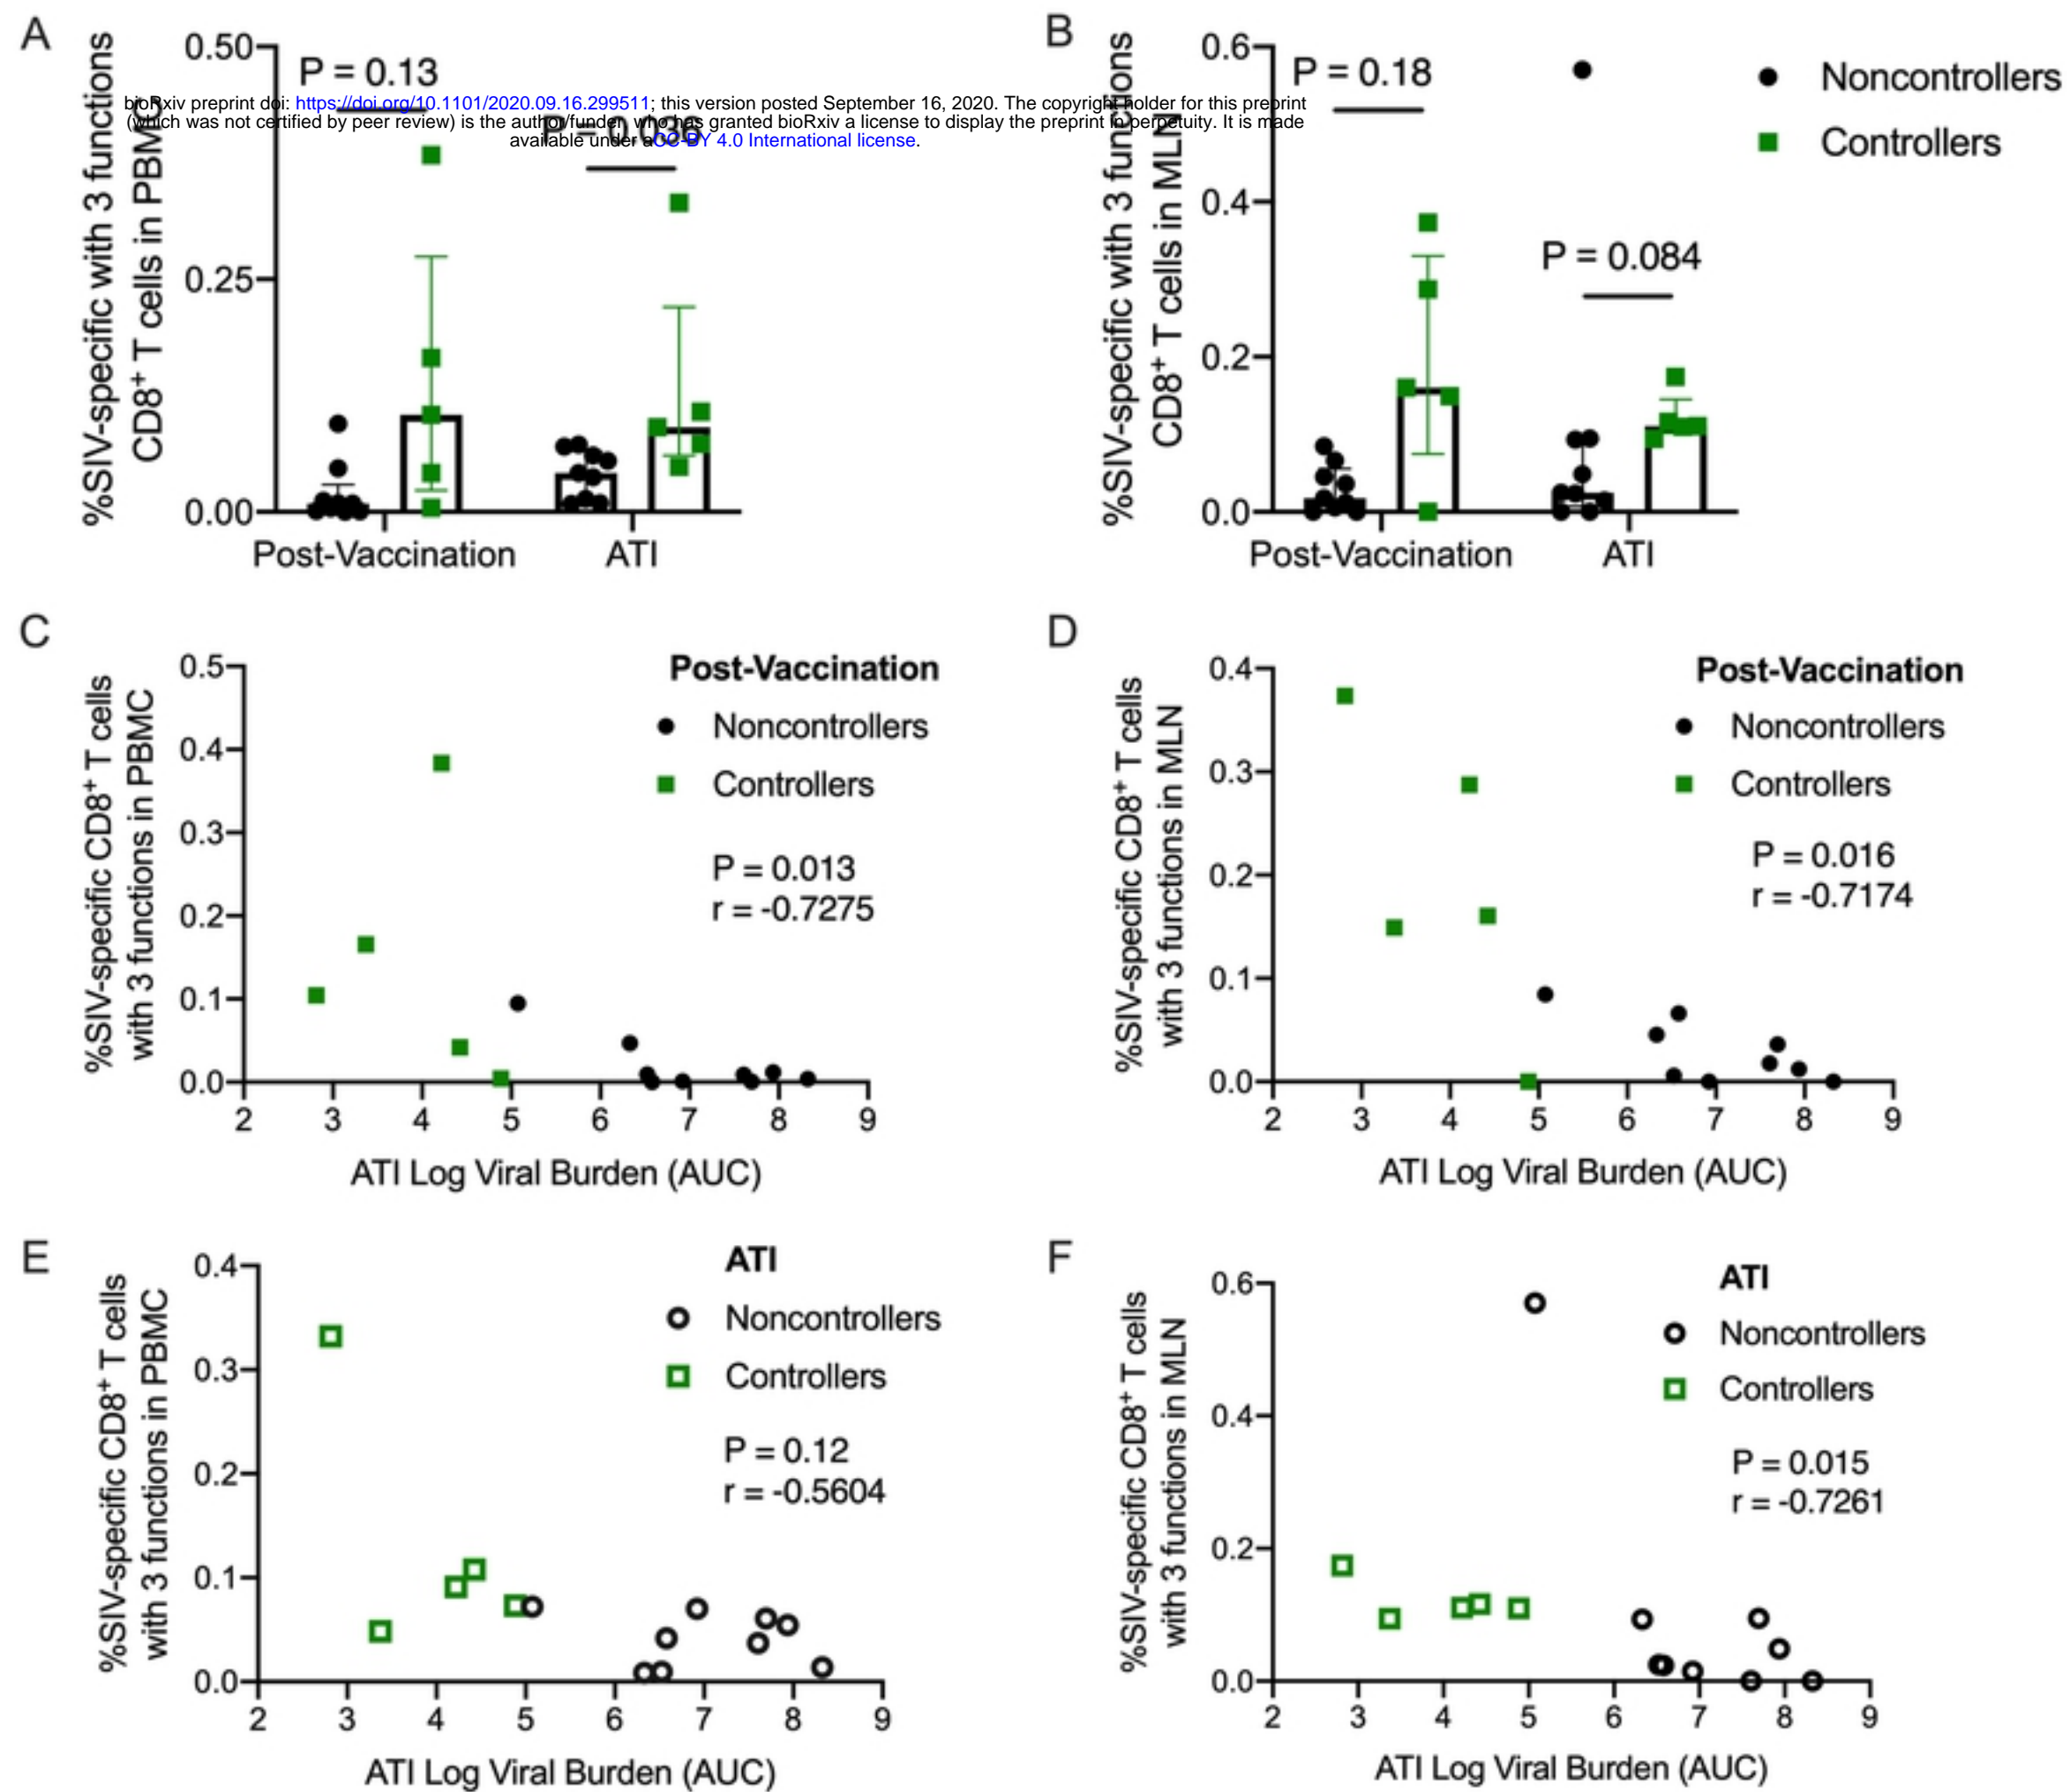

Fig 8



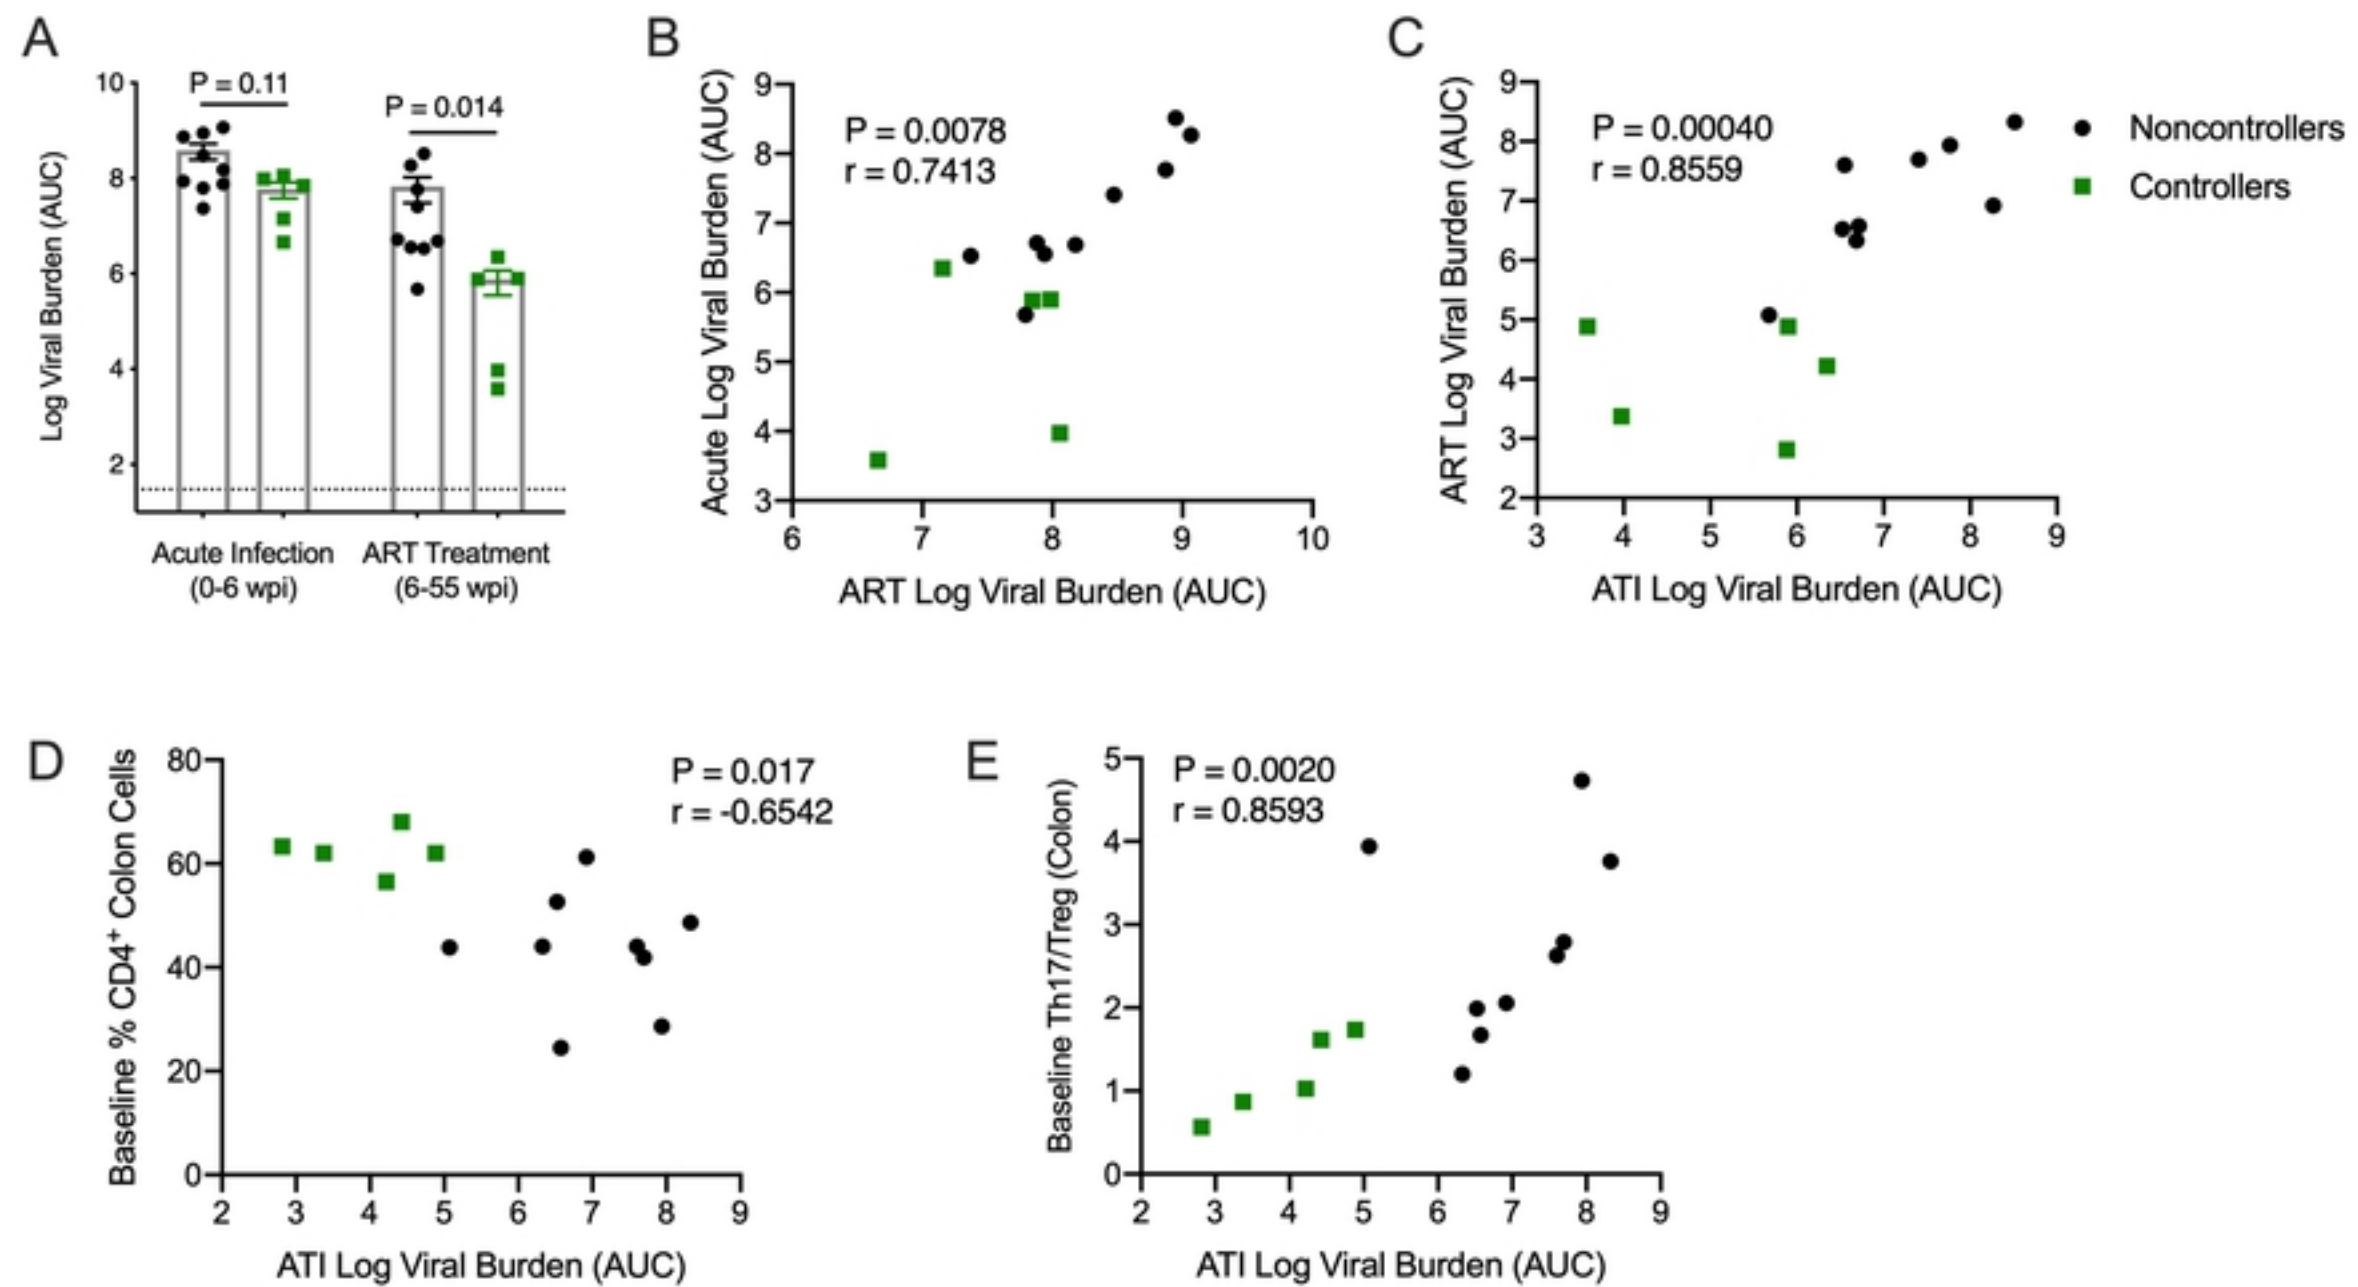

Fig 9
